# Supplementary material for: Genetic Control of Myelin Plasticity after Chronic Psychosocial Stress
Source: eNeuro. 2018 Jul 11;5(4):ENEURO.0166-18.2018. doi: 10.1523/ENEURO.0166-18.2018 (PMC6071195; doi:10.1523/ENEURO.0166-18.2018)
Supplement: Extended Data Figure 1-1 — Exact p values for all behavioral tests. The test used for each parameter depicted in Figure 1C–I are outlined along with results of post hoc contrasts. D2: DBA/2NCrl strain; BALB: Balb/cAnNCrl; 129: 129S2/SvPasCrl; B6: C57BL/6NCrl. Download Figure 1-1, XLSX file. [file sup_enu-eN-NWR-0166-18-s03.xlsx]

## Sheet: Sheet1
Figure 1-1. Exact p-values for all behavioral tests.
Time in IZ (Fig. 1C)	Mixed ANOVA (phenotype * trial), post hoc comparison of no target and target trials
Strain	Contrast	p-value	Significance (following multiple comparisons adj.)
129	Control	0.0243968
	Resilient	0.0844666
	Susceptible	9.81965e-08	***
BALB	Control	5.3487e-11	***
	Resilient	0.0177244
	Susceptible	4.79839e-09	***
B6	Control	1.8725e-12	***
	Resilient	3.89877e-21	***
	Susceptible	2.95497e-08	***
D2	Control	1.38643e-12	***
	Resilient	0.12765
	Susceptible	3.0225e-14	***
Time in corners (Fig. 1D)	Mixed ANOVA (phenotype * trial), post hoc comparison of no target and target trials
Strain	Contrast	p-value	Significance (following multiple comparisons adj.)
129	Control	0.147087
	Resilient	0.224183
	Susceptible	0.00265591	**
BALB	Control	0.231979
	Resilient	0.268647
	Susceptible	1.55362e-08	***
B6	Control	0.134723
	Resilient	0.0170485
	Susceptible	2.98659e-09	***
D2	Control	0.0652032
	Resilient	0.115149
	Susceptible	2.42544e-06	***
Distance travelled in SA test without target (Fig. 1E)	One-way ANOVA (phenotype * trial), post hoc comparison of phenotypes
Strain	Contrast	p-value	Significance (following multiple comparisons adj.)
129	Control vs Resilient	0.9006
	Control vs Susceptible	0.2243
	Resilient vs Susceptible	0.4436
BALB	Control vs Resilient	0.6283
	Control vs Susceptible	0.8036
	Resilient vs Susceptible	0.5155
B6	Control vs Resilient	7.22766e-05	***
	Control vs Susceptible	1.10523e-08	***
	Resilient vs Susceptible	0.00602742	***
D2	Control vs Resilient	0.0307585
	Control vs Susceptible	1.79974e-06	***
	Resilient vs Susceptible	0.551898
Distance travelled during OF (Fig. 1F)	One-way ANOVA (phenotype * trial), post hoc comparison of phenotypes
Strain	Contrast	p-value	Significance (following multiple comparisons adj.)
129	Control vs Resilient	0.4036
	Control vs Susceptible	0.0569
	Resilient vs Susceptible	0.5819
BALB	Control vs Resilient	0.7392
	Control vs Susceptible	0.348
	Resilient vs Susceptible	0.7434
B6	Control vs Resilient	0.0072	**
	Control vs Susceptible	0.3281
	Resilient vs Susceptible	0.5106
	Independent t-test
	Contrast	p-value	Significance
D2	Control vs Susceptible	0.0008	***
Time in open zones of EZM (Fig. 1G)	One-way ANOVA (phenotype * trial), post hoc comparison of phenotypes
Strain	Contrast	p-value	Significance (following multiple comparisons adj.)
B6	Control vs Resilient	0.0883
	Control vs Susceptible	0.0036	*
	Resilient vs Susceptible	0.0774
Immobility time during minutes 2-6 of FST (Fig. 1H)	One-way ANOVA (phenotype * trial), post hoc comparison of phenotypes
Strain	Contrast	p-value	Significance (following multiple comparisons adj.)
B6	Control vs Resilient	0.2781
	Control vs Susceptible	0.2645
	Resilient vs Susceptible	0.8819
∆body weight during CSDS (Fig. 1I)	One-way ANOVA (phenotype * trial), post hoc comparison of phenotypes
Strain	Contrast	p-value	Significance (following multiple comparisons adj.)
129	Control vs Resilient	0.0719
	Control vs Susceptible	0.0233
	Resilient vs Susceptible	0.8056
BALB	Control vs Resilient	0.0177
	Control vs Susceptible	0.0063	*
	Resilient vs Susceptible	0.754
B6	Control vs Resilient	0.2096
	Control vs Susceptible	0.2772
	Resilient vs Susceptible	0.0367
D2	Control vs Resilient	0.0053	*
	Control vs Susceptible	2.28925e-05	***
	Resilient vs Susceptible	0.1451
