# Supplementary material for: Genetic Control of Myelin Plasticity after Chronic Psychosocial Stress
Source: eNeuro. 2018 Jul 11;5(4):ENEURO.0166-18.2018. doi: 10.1523/ENEURO.0166-18.2018 (PMC6071195; doi:10.1523/ENEURO.0166-18.2018)
Supplement: Extended Data Figure 2-1 — SI ratios, division of mice to phenotypic groups, library preparation and sequencing batches, and the number of analyzed RNA-seq reads. mPFC: medial prefrontal cortex; vHPC: ventral hippocampus; BNST: bed nucleus of the stria terminalis; B6: C57BL/6NCrl; D2: DBA/2NCrl. Download Figure 2-1, XLSX file. [file sup_enu-eN-NWR-0166-18-s04.xlsx]

## Sheet: Supplementary Table
Figure 2-1. Social interaction ratios (SI), division of mice to phenotypic groups, library preparation and sequencing batches, and the number of analyzed RNA-seq reads (for data presented in Fig. 2).
mPFC = medial prefrontal cortex, vHPC = ventral hippocampus, BNST = bed nucleus of the stria terminalis, B6 = C57BL/6NCrl, D2 = DBA/2NCrl.
Brain region	Strain	Sample	Treatment	Phenotype	SI ratio	Library set	Sequencing set	Number of uniquely mapped annotated reads
mPFC	B6	C1.5	control	control	154.333	5	1	21914467
mPFC	B6	C1.7	control	control	174.588	2	1	18757685
mPFC	B6	C2.17	control	control	131.21	3	1	19229391
mPFC	B6	C2.3	control	control	166.081	1	1	19063044
mPFC	B6	C2.5	control	control	160.413	4	1	26584052
mPFC	B6	C7.7	control	control	176.655	4	1	18604605
mPFC	B6	C1.8	defeated	resilient	169.615	1	1	23430858
mPFC	B6	C2.14	defeated	resilient	174.614	2	1	22744268
mPFC	B6	C2.20	defeated	resilient	379.29	2	1	20112862
mPFC	B6	C2.6	defeated	resilient	399.685	1	1	19610021
mPFC	B6	C5.19	defeated	resilient	326.667	4	1	28932444
mPFC	B6	C5.7	defeated	resilient	201.453	3	1	20935686
mPFC	B6	C5.4	defeated	susceptible	0	4	1	37034746
mPFC	B6	C7.14	defeated	susceptible	27.0146	4	1	25166241
mPFC	B6	C7.15	defeated	susceptible	25.2322	3	1	17952018
mPFC	B6	C7.17	defeated	susceptible	0	1	1	17264800
mPFC	B6	C7.19	defeated	susceptible	5.49954	2	1	21344981
mPFC	B6	C7.21	defeated	susceptible	1.49738	3	1	19561986
mPFC	D2	D10.10	control	control	184.891	3	1	21783304
mPFC	D2	D10.12	control	control	211.766	2	1	21589838
mPFC	D2	D10.19	control	control	172.094	4	1	20871569
mPFC	D2	D10.22	control	control	204.281	4	1	26785473
mPFC	D2	D10.8	control	control	158.577	1	1	24100579
mPFC	D2	D5.3	control	control	196.065	1	1	20620552
mPFC	D2	D10.20	defeated	susceptible	1.58067	3	1	22049607
mPFC	D2	D10.21	defeated	susceptible	0	2	1	29383090
mPFC	D2	D10.5	defeated	susceptible	0	4	1	20257407
mPFC	D2	D10.7	defeated	susceptible	10.4595	1	1	27919153
mPFC	D2	D10.9	defeated	susceptible	34.2332	2	1	18472292
mPFC	D2	D4.7	defeated	susceptible	0.383142	5	1	20010599
mPFC	D2	D5.8	defeated	susceptible	0	2	1	27257441
mPFC	D2	D8.14	defeated	susceptible	0	3	1	25342554
BNST	B6	EC3.12	control	control	126.829	1	2, 4	12389258
BNST	B6	EC3.15	control	control	141.871	1	1, 3	14183756
BNST	B6	EC4.17	control	control	115.204	2	2, 3	16362207
BNST	B6	EC4.19	control	control	161.446	2	1, 4	16276988
BNST	B6	EC4.20	control	control	134.238	1	2, 3	14790864
BNST	B6	EC3.2	defeated	resilient	1070.27	2	1, 3	13650148
BNST	B6	EC3.5	defeated	resilient	340.458	2	2, 4	18274709
BNST	B6	EC3.6	defeated	resilient	223.188	1	1, 4	15382967
BNST	B6	EC4.10	defeated	resilient	182.643	2	1, 3	15071508
BNST	B6	EC4.8	defeated	resilient	265.798	1	2, 4	15667281
BNST	B6	EC3.10	defeated	susceptible	40.9638	2	1, 4	14896145
BNST	B6	EC3.3	defeated	susceptible	0	1	1, 4	11825757
BNST	B6	EC4.12	defeated	susceptible	34.1864	2	2, 3	25793910
BNST	B6	EC4.3	defeated	susceptible	0.495049	2	2, 3	16403075
BNST	B6	EC4.4	defeated	susceptible	16.309	1	2, 3	15242899
BNST	D2	ED3.12	control	control	277.039	1	1, 4	15760958
BNST	D2	ED4.15	control	control	235.665	1	2, 3	14838143
BNST	D2	ED6.38	control	control	211.706	2	1, 4	15758991
BNST	D2	ED6.39	control	control	197.613	2	2, 3	14148230
BNST	D2	ED6.40	control	control	366.666	1	2, 3	16264455
BNST	D2	ED1.3	defeated	resilient	300	1	1, 3	13477337
BNST	D2	ED1.7	defeated	resilient	2541.67	1	2, 4	14327263
BNST	D2	ED2.1	defeated	resilient	203.031	2	1, 4	15304497
BNST	D2	ED3.4	defeated	susceptible	0	2	2	12728661
BNST	D2	ED4.1	defeated	susceptible	0	2	1	21167139
BNST	D2	ED4.3	defeated	susceptible	0	1	2, 4	12761880
BNST	D2	ED4.4	defeated	susceptible	0	2	1	17243660
BNST	D2	ED6.5	defeated	susceptible	0	1	1	17409209
vHPC	B6	C1.13	control	control	127.532	6	1	18261272
vHPC	B6	C1.3	control	control	178.59	5	1	12755256
vHPC	B6	C1.7	control	control	174.588	6	1	17039588
vHPC	B6	C2.13	control	control	123.442	9	1	16567920
vHPC	B6	C2.23	control	control	223.222	9	1	16860734
vHPC	B6	C2.5	control	control	160.413	9	1	10516228
vHPC	B6	C1.14	defeated	resilient	87.3543	1	2	21297248
vHPC	B6	C1.18	defeated	resilient	229.986	1	2	22931954
vHPC	B6	C1.2	defeated	resilient	189.257	2	2	11698040
vHPC	B6	C2.18	defeated	resilient	93.2584	7	1	10914609
vHPC	B6	C2.20	defeated	resilient	379.29	2	2	10477162
vHPC	B6	C2.24	defeated	resilient	211.911	3	2	11225777
vHPC	B6	C2.6	defeated	resilient	399.685	2	2	8410633
vHPC	B6	C2.8	defeated	resilient	2632.14	3	2	10880069
vHPC	B6	C1.12	defeated	susceptible	24.8957	8	1	22002833
vHPC	B6	C1.19	defeated	susceptible	36.7316	1	2	18243462
vHPC	B6	C2.2	defeated	susceptible	65.2911	10	1	10512559
vHPC	D2	D4.2	control	control	119.584	7	1	26439053
vHPC	D2	D4.4	control	control	219.218	10	1	16267028
vHPC	D2	D4.6	control	control	19.3402	10	1	16972458
vHPC	D2	D4.8	control	control	117.708	3	2	13303078
vHPC	D2	D5.3	control	control	196.065	7	1	9247610
vHPC	D2	D5.5	control	control	374.555	8	1	9810331
vHPC	D2	D4.3	defeated	susceptible	5.83058	4	2	21540354
vHPC	D2	D4.7	defeated	susceptible	0.383142	4	2	21035082
vHPC	D2	D5.4	defeated	susceptible	0	5	2	12356056
vHPC	D2	D5.6	defeated	susceptible	3.42612	5	2	13024741
vHPC	D2	D5.8	defeated	susceptible	0	8	1	9978051
