# Supplementary material for: Genetic Control of Myelin Plasticity after Chronic Psychosocial Stress
Source: eNeuro. 2018 Jul 11;5(4):ENEURO.0166-18.2018. doi: 10.1523/ENEURO.0166-18.2018 (PMC6071195; doi:10.1523/ENEURO.0166-18.2018)
Supplement: Extended Data Figure 2-5 — Significantly (p < 0.05) enriched GO terms within the top 300 upregulated and top 300 downregulated genes for each comparison, converging with results from GSEA (Fig. 2E). mPFC: medial prefrontal cortex; vHPC: ventral hippocampus; BNST: bed nucleus of the stria terminalis; B6: C57BL/6NCrl; D2: DBA/2NCrl; Res: resilient; Sus: susceptible; Con: control; BP: biological process; CC: cellular component; MF: molecular function. Download Figure 2-5, XLSX file. [file sup_enu-eN-NWR-0166-18-s08.xlsx]

## Sheet: B6 res-con UP mPFC
Figure 2-5. Significantly (p < 0.05) enriched Gene Ontology (GO) terms within the top 300 up and top 300 down-regulated genes for each comparison, converging with results from GSEA (Fig. 2E).
mPFC = medial prefrontal cortex, vHPC = ventral hippocampus, BNST = bed nucleus of the stria terminalis, B6 = C57BL/6NCrl, D2 = DBA/2NCrl.
res = resilient, sus = susceptible, con = control.
BP = biological process, CC = cellular component, MF = molecular function.
GO.ID	Term	Annotated	Significant	P	Category	Genes
GO:0016616	oxidoreductase activity, acting on the CH-OH group of donors, NAD or NADP as acceptor	12	5	0.0031	MF	Akr1b3, Rdh5, Nsdhl, Hsd3b7, 4933405O20Rik
GO:0005811	lipid particle	5	3	0.0039	CC	Plin4, Nsdhl, Aldh3b2
GO:0005871	kinesin complex	7	3	0.0122	CC	Kifc5b, Kif18a, Kif15
GO:0006695	cholesterol biosynthetic process	3	2	0.016	BP	Npc1l1, Nsdhl
GO:0010332	response to gamma radiation	3	2	0.016	BP	Myc, Fancd2
GO:0031424	keratinization	3	2	0.016	BP	Ppl, Abca12
GO:0086073	bundle of His cell-Purkinje myocyte adhesion involved in cell communication	3	2	0.016	BP	Dsc2, Pkp2
GO:0090344	negative regulation of cell aging	3	2	0.016	BP	Foxm1, Bcl2l12
GO:0098911	regulation of ventricular cardiac muscle cell action potential	3	2	0.016	BP	Dsc2, Pkp2
GO:0030057	desmosome	3	2	0.0166	CC	Dsc2, Pkp2
GO:2000113	negative regulation of cellular macromolecule biosynthetic process	101	8	0.017	BP	Foxm1, Grb7, Myc, Msc, Pask, Acer2, Ppp1r13l, H2afv
GO:0016229	steroid dehydrogenase activity	3	2	0.0171	MF	Nsdhl, Hsd3b7
GO:0031463	Cul3-RING ubiquitin ligase complex	8	3	0.0185	CC	Klhl35, Kbtbd7, Kbtbd6
GO:0006754	ATP biosynthetic process	4	2	0.031	BP	Myc, Atp5g2
GO:0048286	lung alveolus development	4	2	0.031	BP	Flt4, Abca12
GO:0050982	detection of mechanical stimulus	4	2	0.031	BP	Myc, Loxhd1
GO:0086091	regulation of heart rate by cardiac conduction	4	2	0.031	BP	Dsc2, Pkp2
GO:0097009	energy homeostasis	4	2	0.031	BP	Pask, Pm20d1
GO:1990845	adaptive thermogenesis	4	2	0.031	BP	Pm20d1, Mc4r
GO:0042470	melanosome	4	2	0.0315	CC	Dct, Mlph
GO:0035091	phosphatidylinositol binding	16	3	0.0323	MF	Grb7, Myo1g, Pask
GO:0005070	SH3/SH2 adaptor activity	4	2	0.0324	MF	Grb7, Skap1
GO:0030551	cyclic nucleotide binding	4	2	0.0324	MF	Pde6c, Bves
GO:0046513	ceramide biosynthetic process	10	3	0.034	BP	Aloxe3, St8sia2, Sptssb
GO:0019838	growth factor binding	10	3	0.0367	MF	Flt4, Il1r1, Tnfrsf23
GO:0015992	proton transport	5	2	0.049	BP	Pm20d1, Atp5g2
GO:0035914	skeletal muscle cell differentiation	5	2	0.049	BP	Myc, Maff
GO:0046173	polyol biosynthetic process	5	2	0.049	BP	Akr1b3, Acer2
GO:0048661	positive regulation of smooth muscle cell proliferation	5	2	0.049	BP	Akr1b3, Myc

## Sheet: B6 res-con DOWN mPFC
GO.ID	Term	Annotated	Significant	P	Category	Genes
GO:0035458	cellular response to interferon-beta	10	6	3.6e-06	BP	Gbp3, Gbp2, Ifit1, Iigp1, Ifit3, Ifi47
GO:0020005	symbiont-containing vacuole membrane	4	4	7.8e-06	CC	Aqp1, Gbp3, Gbp2, Iigp1
GO:0003924	GTPase activity	45	10	8.9e-05	MF	Mx1, Tubb6, Rab37, Gng4, Gbp3, Gbp2, Tuba8, Iigp1, Rsg1, Ifi47
GO:0001078	transcriptional repressor activity, RNA polymerase II core promoter proximal region sequence-specific binding	32	8	0.00019	MF	Btg2, Rela, Hhex, Atf3, Tfap2c, Prdm1, Tshz1, Nfil3
GO:0044406	adhesion of symbiont to host	4	3	0.00056	BP	Ace2, Gbp3, Gbp2
GO:0008344	adult locomotory behavior	12	5	0.00132	BP	Trh, Cdh23, Zic1, Pbx3, Slitrk6
GO:0021877	forebrain neuron fate commitment	5	3	0.00135	BP	Dlx2, Tfap2c, Dlx1
GO:0005525	GTP binding	64	10	0.00174	MF	Mx1, Tubb6, Rab37, Npr1, Gbp3, Gbp2, Tuba8, Arl4d, Iigp1, Rsg1
GO:0001102	RNA polymerase II activating transcription factor binding	11	4	0.00189	MF	Hey2, Fos, Mad2l2, Eomes
GO:0043195	terminal bouton	12	4	0.0027	CC	Th, Calb2, Mical1, Prph
GO:0050953	sensory perception of light stimulus	40	6	0.00274	BP	Th, Cdh23, Col11a1, Ush1g, Slitrk6, Nyx
GO:0007608	sensory perception of smell	7	3	0.00438	BP	Slc6a3, Omp, Olfr286, Olfr287
GO:0009954	proximal/distal pattern formation	7	3	0.00438	BP	Dlx2, Dlx1, Sp8
GO:0010460	positive regulation of heart rate	7	3	0.00438	BP	Hey2, Adm, Nppa
GO:0035914	skeletal muscle cell differentiation	22	5	0.005	BP	Btg2, Fos, Nr4a1, Atf3, Eomes
GO:0048662	negative regulation of smooth muscle cell proliferation	14	4	0.00503	BP	Vipr2, Ace2, Apod, Npr1
GO:0045746	negative regulation of Notch signaling pathway	15	4	0.00658	BP	Hey2, Dlx2, Dlx1, 1810011O10Rik
GO:0042832	defense response to protozoan	8	3	0.00673	BP	Gbp3, Gbp2, Iigp1
GO:0043408	regulation of MAPK cascade	161	9	0.00694	BP	Ace2, Map3k1, Gdf10, Dusp1, Gdf11, Atf3, Cyr61, Npffr2, Igf2
GO:1901652	response to peptide	56	7	0.00792	BP	Stat5a, Npffr1, Nr4a1, Rela, Agtrap, Npffr2, Igf2
GO:0021772	olfactory bulb development	6	3	0.00802	BP	Dlx2, Dlx5, Eomes
GO:0042805	actinin binding	13	3	0.00808	MF	Mybpc1, Rela, Micall2
GO:0000289	nuclear-transcribed mRNA poly(A) tail shortening	3	2	0.00809	BP	Btg2, Pnldc1
GO:0002483	antigen processing and presentation of endogenous peptide antigen	3	2	0.00809	BP	H2-M3, H2-K1
GO:0007168	receptor guanylyl cyclase signaling pathway	3	2	0.00809	BP	Npr1, Nppa
GO:0010592	positive regulation of lamellipodium assembly	3	2	0.00809	BP	Aqp1, Frmd7
GO:0016486	peptide hormone processing	3	2	0.00809	BP	Ace2, Enpep
GO:0021892	cerebral cortex GABAergic interneuron differentiation	3	2	0.00809	BP	Dlx2, Dlx1
GO:0042104	positive regulation of activated T cell proliferation	3	2	0.00809	BP	Stat5a, Igf2
GO:0050957	equilibrioception	3	2	0.00809	BP	Cdh23, Ush1g
GO:0060134	prepulse inhibition	3	2	0.00809	BP	Fabp7, Slc6a3
GO:0060177	regulation of angiotensin metabolic process	3	2	0.00809	BP	Ace2, Enpep
GO:1902869	regulation of amacrine cell differentiation	3	2	0.00809	BP	Dlx2, Dlx1
GO:0035240	dopamine binding	3	2	0.00812	MF	Th, Slc6a3
GO:0009755	hormone-mediated signaling pathway	32	3	0.00813	BP	Stat5a, Trh, Nr4a1
GO:0042622	photoreceptor outer segment membrane	3	2	0.0082	CC	Cdhr1, Prph
GO:0045087	innate immune response	138	16	0.00941	BP	Mx1, Stat5a, Tnfaip8l2, H2-M3, Ly86, Gsdmd, Tfeb, Rela, Gbp3, Gbp2, Ifit1, Prdm1, Igf2, Iigp1, Ifit3, Gbp4
GO:0035094	response to nicotine	9	3	0.00971	BP	Chrna2, Rela, Igf2
GO:0031668	cellular response to extracellular stimulus	35	4	0.00976	BP	Asgr1, Fos, Gsdmd, Atf3
GO:0005615	extracellular space	295	25	0.0122	CC	Ltbp2, Ace2, Gdf10, Apod, Gsdmd, Gdf11, Col11a1, Cyr61, Pappa, Spp1, Adm, Bgn, Adamts7, Frmd7, Gcnt1, Fmod, Nppa, Cpa6, Hilpda, Omd, Igf2, Fam19a3, Sod3, Ccl28, Lrrc55
GO:0005578	proteinaceous extracellular matrix	103	12	0.0128	CC	Ltbp2, Fbln7, Col11a1, Col24a1, Bgn, Adamts7, Fmod, Cpa6, Omd, Nyx, Adamts19, Lrrc55
GO:0004725	protein tyrosine phosphatase activity	18	4	0.01311	MF	Eya2, Ptpn20, Dusp1, Ptpro
GO:0001763	morphogenesis of a branching structure	58	5	0.0156	BP	Dlx2, Hhex, Tfap2c, Adm, Prdm1
GO:0001991	regulation of systemic arterial blood pressure by circulatory renin-angiotensin	4	2	0.01562	BP	Ace2, Enpep
GO:0030204	chondroitin sulfate metabolic process	4	2	0.01562	BP	Bgn, Chst7
GO:0031274	positive regulation of pseudopodium assembly	4	2	0.01562	BP	Gm14137, Cdc42ep5
GO:0035457	cellular response to interferon-alpha	4	2	0.01562	BP	Ifit1, Ifit3
GO:0035994	response to muscle stretch	4	2	0.01562	BP	Fos, Rela
GO:0048715	negative regulation of oligodendrocyte differentiation	4	2	0.01562	BP	Dlx2, Dlx1
GO:0060413	atrial septum morphogenesis	4	2	0.01562	BP	Hey2, Cyr61
GO:0060850	regulation of transcription involved in cell fate commitment	4	2	0.01562	BP	Dlx2, Dlx1
GO:1904667	negative regulation of ubiquitin protein ligase activity	4	2	0.01562	BP	Mad2l2, Rps7
GO:0006836	neurotransmitter transport	25	3	0.01563	BP	Th, Slc6a3, Doc2g
GO:0000983	transcription factor activity, RNA polymerase II core promoter sequence-specific	4	2	0.01567	MF	Hey2, Rela
GO:0001758	retinal dehydrogenase activity	4	2	0.01567	MF	Akr1c18, Aldh1a1
GO:0016500	protein-hormone receptor activity	4	2	0.01567	MF	Lgr5, Lgr6
GO:0016655	oxidoreductase activity, acting on NAD(P)H, quinone or similar compound as acceptor	4	2	0.01567	MF	Akr1c18, ND3
GO:0017049	GTP-Rho binding	4	2	0.01567	MF	Gm14137, Cdc42ep5
GO:0050880	regulation of blood vessel size	37	3	0.01573	BP	Npr1, Adm, Nppa
GO:0098655	cation transmembrane transport	96	5	0.0159	BP	Aqp1, Trdn, Chrna2, Cacng5, Nppa
GO:0007204	positive regulation of cytosolic calcium ion concentration	56	6	0.01681	BP	Trdn, Nmb, Adm, Gpr6, Chrna10, Ccl28
GO:0040018	positive regulation of multicellular organism growth	11	3	0.01763	BP	Stat5a, Slc6a3, Igf2
GO:0050829	defense response to Gram-negative bacterium	11	3	0.01763	BP	Gsdmd, Tfeb, Iigp1
GO:0071277	cellular response to calcium ion	11	3	0.01763	BP	Rasa4, Akr1c18, Fos
GO:0071346	cellular response to interferon-gamma	11	3	0.01763	BP	Gbp3, Gbp2, Gbp4
GO:0005200	structural constituent of cytoskeleton	11	3	0.01772	MF	Tubb6, Mybpc1, Tuba8
GO:0042472	inner ear morphogenesis	25	6	0.02185	BP	Cdh23, Col11a1, Dlx5, Ush1g, Slitrk6, Chrna10
GO:0005929	cilium	120	9	0.0229	CC	Kif19a, Vipr2, Cdh23, Dnah11, Cdhr1, Prph, Stoml3, Ush1g, Rsg1
GO:0044706	multi-multicellular organism process	29	5	0.02472	BP	Stat5a, Akr1c18, Prdm1, Nppa, Ddo
GO:0071375	cellular response to peptide hormone stimulus	33	5	0.02477	BP	Stat5a, Nr4a1, Rela, Agtrap, Igf2
GO:0006182	cGMP biosynthetic process	8	3	0.02493	BP	Aqp1, Npr1, Nppa
GO:0001963	synaptic transmission, dopaminergic	5	2	0.02513	BP	Th, Slc6a3
GO:0002138	retinoic acid biosynthetic process	5	2	0.02513	BP	Akr1c18, Aldh1a1
GO:0007215	glutamate receptor signaling pathway	5	2	0.02513	BP	Grid2ip, Cacng5
GO:0014898	cardiac muscle hypertrophy in response to stress	5	2	0.02513	BP	Hey2, Nppa
GO:0021846	cell proliferation in forebrain	5	2	0.02513	BP	Fabp7, Hhex
GO:0035634	response to stilbenoid	5	2	0.02513	BP	Usp18, Ifit3
GO:0042416	dopamine biosynthetic process	5	2	0.02513	BP	Th, Slc6a3
GO:0046533	negative regulation of photoreceptor cell differentiation	5	2	0.02513	BP	Dlx2, Dlx1
GO:0060452	positive regulation of cardiac muscle contraction	5	2	0.02513	BP	Ace2, Nppa
GO:0060706	cell differentiation involved in embryonic placenta development	5	2	0.02513	BP	Eomes, Prdm1
GO:0071276	cellular response to cadmium ion	5	2	0.02513	BP	Akr1c18, Fos
GO:2000678	negative regulation of transcription regulatory region DNA binding	5	2	0.02513	BP	Hey2, Mad2l2
GO:0008146	sulfotransferase activity	5	2	0.02522	MF	Chst7, Hs3st3b1
GO:0008432	JUN kinase binding	5	2	0.02522	MF	Map3k1, Mad2l2
GO:0016709	oxidoreductase activity, acting on paired donors, with incorporation or reduction of molecular oxygen, NAD(P)H as one donor, and incorporation of one atom of oxygen	5	2	0.02522	MF	Mical1, Akr1c18
GO:0071949	FAD binding	5	2	0.02522	MF	Mical1, Ddo
GO:0032281	AMPA glutamate receptor complex	5	2	0.0253	CC	Cacng5, Shisa8
GO:0045494	photoreceptor cell maintenance	13	3	0.02827	BP	Cdh23, Cdhr1, Ush1g
GO:0004222	metalloendopeptidase activity	23	4	0.03084	MF	Pappa, Adamts7, Adamts19, Tll1
GO:0021766	hippocampus development	11	3	0.03614	BP	Btg2, Dlx2, Dlx1
GO:0042177	negative regulation of protein catabolic process	19	3	0.03628	BP	Rela, Mad2l2, Rps7
GO:0001916	positive regulation of T cell mediated cytotoxicity	6	2	0.03639	BP	H2-M3, H2-K1
GO:0008209	androgen metabolic process	6	2	0.03639	BP	Spp1, Adm
GO:0021544	subpallium development	6	2	0.03639	BP	Dlx2, Dlx1
GO:0042447	hormone catabolic process	6	2	0.03639	BP	Akr1c18, Spp1
GO:0042574	retinal metabolic process	6	2	0.03639	BP	Akr1c18, Cyp1b1
GO:0048385	regulation of retinoic acid receptor signaling pathway	6	2	0.03639	BP	Crabp2, Akr1c18
GO:0050910	detection of mechanical stimulus involved in sensory perception of sound	6	2	0.03639	BP	Col11a1, Chrna10
GO:0022848	acetylcholine-gated cation-selective channel activity	6	2	0.03652	MF	Chrna2, Chrna10
GO:0043025	neuronal cell body	93	11	0.0366	CC	Th, S100a5, Tbx21, Aqp1, Fabp7, Slc6a3, Apod, Prph, Frmd7, Chrna10, Omp
GO:0005892	acetylcholine-gated channel complex	6	2	0.0367	CC	Chrna2, Chrna10
GO:0051047	positive regulation of secretion	86	5	0.03681	BP	Aqp1, Trh, Gsdmd, Nmb, Spp1
GO:0005179	hormone activity	22	5	0.04095	MF	Fndc5, Trh, Adm, Nppa, Igf2
GO:0060395	SMAD protein signal transduction	15	3	0.04161	BP	Fos, Gdf10, Gdf11
GO:0050840	extracellular matrix binding	15	3	0.04181	MF	Cyr61, Spp1, Bgn
GO:0001077	transcriptional activator activity, RNA polymerase II core promoter proximal region sequence-specific binding	62	7	0.04419	MF	Fos, Nr4a1, Tfeb, Rela, Tfap2c, Dlx5, Zic1
GO:0005198	structural molecule activity	93	10	0.04429	MF	Tubb6, Mybpc1, Sntg2, Prph, Col11a1, Col24a1, Tuba8, Krt9, Lmntd1, Rps7
GO:0005667	transcription factor complex	60	6	0.0444	CC	Hey2, Fos, Nr4a1, Tfeb, Rela, Pbx3
GO:0022008	neurogenesis	272	26	0.04452	BP	Th, Crabp2, Cdh23, Hey2, Fabp7, Btg2, Dlx2, Rela, Gdf11, Tfap2c, Dlx5, Ptpro, Adm, Eomes, Plk5, Frmd7, Micall2, Prdm1, Pbx3, Dlx1, Ush1g, Slitrk6, H2-K1, Xlr3b, Omp, Lrrc55
GO:0002250	adaptive immune response	75	8	0.04811	BP	Tbx21, H2-M3, Samsn1, Tfeb, Il13ra2, Eomes, Prdm1, H2-K1
GO:0007409	axonogenesis	57	5	0.04903	BP	Crabp2, Dlx5, Ptpro, Slitrk6, Lrrc55
GO:0001829	trophectodermal cell differentiation	7	2	0.04919	BP	Tfap2c, Eomes
GO:0007628	adult walking behavior	7	2	0.04919	BP	Trh, Zic1
GO:0042462	eye photoreceptor cell development	7	2	0.04919	BP	Th, Prdm1
GO:0045579	positive regulation of B cell differentiation	7	2	0.04919	BP	Stat5a, Prdm1
GO:0045954	positive regulation of natural killer cell mediated cytotoxicity	7	2	0.04919	BP	Stat5a, H2-M3
GO:1902895	positive regulation of pri-miRNA transcription from RNA polymerase II promoter	7	2	0.04919	BP	Fos, Rela
GO:2001259	positive regulation of cation channel activity	7	2	0.04919	BP	Trdn, Nppa
GO:0045471	response to ethanol	16	3	0.04927	BP	Th, Slc6a3, Aldh1a1
GO:0070373	negative regulation of ERK1 and ERK2 cascade	16	3	0.04927	BP	Ace2, Dusp1, Atf3
GO:0005184	neuropeptide hormone activity	7	2	0.04936	MF	Trh, Nppa
GO:0008519	ammonium transmembrane transporter activity	7	2	0.04936	MF	Aqp1, Slc6a3
GO:0050673	epithelial cell proliferation	92	6	0.04942	BP	Stat5a, Fabp7, Lgr5, Nr4a1, Tfap2c, Dlx5
GO:0006813	potassium ion transport	36	3	0.04943	BP	Aqp1, Slc12a8, Nppa
GO:0000980	RNA polymerase II distal enhancer sequence-specific DNA binding	16	3	0.0495	MF	Rela, Tfap2c, Pbx3
GO:0047485	protein N-terminus binding	16	3	0.0495	MF	Cdh23, Slc6a3, Rela
GO:0009987	cellular process	2787	152	0.04971	BP	Th, Mx1, Fndc5, Tbx21, Tubb6, Ltbp2, Ppm1j, Calb2, Stat5a, Aqp1, Crabp2, Rasa4, Trh, Abhd1, Zmat5, Tex15, Kif19a, Grid2ip, Vipr2, Cdh23, Tnfaip8l2, Pam16, Ace2, H2-M3, Eya2, Il12rb2, Dnah11, Calr3, Trdn, Hey2, Mical1, Fabp7, Mybpc1, Npffr1, Lgr5, Btg2, Rab37, Asgr1, Akr1c18, Fos, Gng4, Ly86, Slc6a3, Map3k1, Cdhr1, Ptpn20, Gdf10, Chrna2, Mtbp, Apod, Gsdmd, Samsn1, Nr4a1, Dlx2, Prph, Tfeb, Cyp1b1, …

## Sheet: B6 sus-con UP mPFC
GO.ID	Term	Annotated	Significant	P	Category	Genes
GO:0015106	bicarbonate transmembrane transporter activity	4	3	0.0003	MF	Slc26a2, Slc26a7, Slc4a11
GO:0015695	organic cation transport	5	3	0.00072	BP	Slc47a1, Slc22a3, Slc22a2
GO:0015701	bicarbonate transport	5	3	0.00072	BP	Slc26a2, Slc26a7, Slc4a11
GO:0015301	anion:anion antiporter activity	6	3	0.0014	MF	Slc26a2, Slc26a7, Slc4a11
GO:0030247	polysaccharide binding	7	3	0.0024	MF	Prg4, Susd2, Stbd1
GO:0005154	epidermal growth factor receptor binding	8	3	0.0036	MF	Cd44, Vav2, Cbl
GO:0043548	phosphatidylinositol 3-kinase binding	8	3	0.0036	MF	Met, Cbl, Irs1
GO:0051018	protein kinase A binding	7	3	0.0052	MF	Csk, Rara, Dact2
GO:0010828	positive regulation of glucose transport	14	3	0.00528	BP	Met, Clip3, Irs1
GO:0008271	secondary active sulfate transmembrane transporter activity	3	2	0.0053	MF	Slc26a2, Slc26a7
GO:0008332	low voltage-gated calcium channel activity	3	2	0.0053	MF	Cacna1g, Cacna1i
GO:0008469	histone-arginine N-methyltransferase activity	3	2	0.0053	MF	Carm1, Prmt1
GO:0015651	quaternary ammonium group transmembrane transporter activity	3	2	0.0053	MF	Slc22a3, Slc22a2
GO:0019531	oxalate transmembrane transporter activity	3	2	0.0053	MF	Slc26a2, Slc26a7
GO:0035242	protein-arginine omega-N asymmetric methyltransferase activity	3	2	0.0053	MF	Carm1, Prmt1
GO:0001778	plasma membrane repair	3	2	0.00531	BP	Dysf, Trim72
GO:0034969	histone arginine methylation	3	2	0.00531	BP	Carm1, Prmt1
GO:0043569	negative regulation of insulin-like growth factor receptor signaling pathway	3	2	0.00531	BP	Bmp5, Trim72
GO:0048172	regulation of short-term neuronal synaptic plasticity	3	2	0.00531	BP	Kmt2a, Syn1
GO:0070092	regulation of glucagon secretion	3	2	0.00531	BP	Pask, Irs1
GO:0071635	negative regulation of transforming growth factor beta production	3	2	0.00531	BP	Met, Furin
GO:1900745	positive regulation of p38MAPK cascade	3	2	0.00531	BP	Met, Prmt1
GO:0009791	post-embryonic development	28	5	0.00597	BP	Kmt2a, Szt2, Ndn, Ppp1r13l, Plagl2
GO:0005544	calcium-dependent phospholipid binding	10	3	0.0073	MF	Anxa11, Anxa1, Dysf
GO:0048306	calcium-dependent protein binding	20	4	0.0091	MF	Anxa11, Anxa1, Mgp, Syn1
GO:0016021	integral component of membrane	1044	66	0.0099	CC	Gabra2, Cnnm3, Lman2l, Grin2d, Bid, Cd44, Susd2, Epha2, Adam21, Fam163b, Met, Kcnd1, Slc47a1, Rhbdl3, Ern1, Cacna1g, Marveld2, Cyc1, Tmem30c, Slc22a3, Syvn1, Mfsd13a, Nnt, Slc16a14, Cers6, Adra1d, Sypl2, Plxna1, Slc41a3, Furin, Trat1, Mpzl2, Ptprf, Dysf, 4930590J08Rik, Tspan8, Slc26a2, Prr7, Impg2, Mia2, Ttyh3, Lrfn3, Slc18b1, Tnfrsf23, Ackr1, Siglecf, Anpep, Sdk1, Slc26a7, Atp1a3, Slc22a2, Fzd1,…
GO:0010565	regulation of cellular ketone metabolic process	28	5	0.0101	BP	Stard4, Anxa1, Ncor2, Bmp5, Irs1
GO:0048406	nerve growth factor binding	4	2	0.0102	MF	Furin, Tnfrsf23
GO:0030285	integral component of synaptic vesicle membrane	4	2	0.0103	CC	Gabra2, Sypl2
GO:0008272	sulfate transport	4	2	0.01031	BP	Slc26a2, Slc26a7
GO:0010801	negative regulation of peptidyl-threonine phosphorylation	4	2	0.01031	BP	Met, Spred2
GO:0045653	negative regulation of megakaryocyte differentiation	4	2	0.01031	BP	Hist1h4n, Prmt1
GO:0051608	histamine transport	4	2	0.01031	BP	Slc22a3, Slc22a2
GO:0001784	phosphotyrosine binding	12	3	0.0126	MF	Vav2, Cbl, Irs1
GO:0045214	sarcomere organization	12	3	0.01273	BP	Neb, Myom2, Klhl41
GO:0046627	negative regulation of insulin receptor signaling pathway	12	3	0.01273	BP	Ptprf, Trim72, Irs1
GO:0070372	regulation of ERK1 and ERK2 cascade	73	8	0.01617	BP	Cd44, Epha2, Ccl17, Csk, Wnk2, Rara, Rras, Dynlt1b
GO:0042127	regulation of cell proliferation	370	22	0.01629	BP	Kmt2a, Bid, Cd44, Prg4, Itk, Ern1, Anxa1, Sf1, Gli1, Bmp5, Carm1, Csk, Ptprf, Ndn, Egln3, Tnfrsf23, Wnk2, Rara, Rreb1, Irs1, Sphk1, Klhl41
GO:0015697	quaternary ammonium group transport	5	2	0.0167	BP	Slc22a3, Slc22a2
GO:0030061	mitochondrial crista	5	2	0.0167	CC	Cyp11a1, Cox6b2
GO:0033029	regulation of neutrophil apoptotic process	5	2	0.0167	BP	Cd44, Anxa1
GO:0045211	postsynaptic membrane	49	6	0.017	CC	Gabra2, Grin2d, Met, Prr7, Lrfn3, Prr12
GO:0030426	growth cone	37	5	0.0193	CC	Ptprf, Cbl, Sncb, Ssh1, Dynlt1b
GO:0004715	non-membrane spanning protein tyrosine kinase activity	14	3	0.0196	MF	Itk, Csk, Prag1
GO:0060048	cardiac muscle contraction	35	4	0.0239	BP	Met, Cacna1g, Ppp1r13l, Atp1a3
GO:0045581	negative regulation of T cell differentiation	10	3	0.02415	BP	Cd44, Anxa1, Dtx1
GO:1901618	organic hydroxy compound transmembrane transporter activity	6	2	0.0242	MF	Slc22a3, Slc22a2
GO:0005891	voltage-gated calcium channel complex	6	2	0.0243	CC	Cacna1g, Catsperg2
GO:0031430	M band	6	2	0.0243	CC	Myom2, Klhl41
GO:0032590	dendrite membrane	6	2	0.0243	CC	Gabra2, Kcnc1
GO:0003417	growth plate cartilage development	6	2	0.02436	BP	Carm1, Rara
GO:0010591	regulation of lamellipodium assembly	6	2	0.02436	BP	Epha2, Ssh1
GO:0015872	dopamine transport	6	2	0.02436	BP	Slc22a3, Slc22a2
GO:0048570	notochord morphogenesis	6	2	0.02436	BP	Epha2, Gli1
GO:0042391	regulation of membrane potential	86	8	0.02776	BP	Bid, Met, Cacna1g, Cacna1i, Slc26a2, Slc26a7, Atp1a3, Ssh1
GO:0006811	ion transport	300	20	0.03122	BP	Gabra2, Cnnm3, Grin2d, Kcnd1, Slc47a1, Cacna1g, Cacna1i, Cyc1, Slc22a3, Anxa1, Nnt, Slc41a3, Slc26a2, Ttyh3, Wnk2, Slc26a7, Atp1a3, Slc22a2, Kcnc1, Slc4a11
GO:0006887	exocytosis	70	6	0.03271	BP	Exoc3l2, Cacna1g, Cacna1i, Anxa1, Rab40c, Trim72
GO:0005254	chloride channel activity	20	4	0.0329	MF	Gabra2, Slc26a2, Ttyh3, Slc26a7
GO:0030552	cAMP binding	7	2	0.033	MF	Pde4a, Cnbd2
GO:0001516	prostaglandin biosynthetic process	7	2	0.03315	BP	Anxa1, Sphk1
GO:0055085	transmembrane transport	231	16	0.03643	BP	Gabra2, Kcnd1, Slc47a1, Cacna1g, Cyc1, Slc22a3, Slc16a14, Slc41a3, Slc26a2, Slc18b1, Wnk2, Slc26a7, Atp1a3, Slc22a2, Kcnc1, Slc4a11
GO:0046777	protein autophosphorylation	74	8	0.03764	BP	Met, Mknk2, Itk, Ern1, Brd4, Pask, Csk, Wnk2
GO:0051453	regulation of intracellular pH	18	3	0.03912	BP	Slc26a2, Slc26a7, Slc4a11
GO:0006836	neurotransmitter transport	35	6	0.04177	BP	Gabra2, Slc22a3, Nrxn2, Syn1, Slc22a2, Sphk1
GO:0022804	active transmembrane transporter activity	79	8	0.0418	MF	Slc47a1, Slc22a3, Slc16a14, Slc26a2, Slc26a7, Atp1a3, Slc22a2, Slc4a11
GO:0070848	response to growth factor	144	11	0.04184	BP	Cd44, Epha2, Ern1, Furin, Bmp5, Cd59a, Ptprf, Ndn, Cbl, Fzd1, Foxd1
GO:0030534	adult behavior	39	5	0.04226	BP	Grin2d, Met, Nrxn2, Sdk1, Atp1a3
GO:0014812	muscle cell migration	35	4	0.04241	BP	Met, Anxa1, Plxna1, Ssh1
GO:0060675	ureteric bud morphogenesis	18	3	0.04247	BP	Cd44, Kif26b, Foxd1
GO:0046632	alpha-beta T cell differentiation	20	3	0.04249	BP	Itk, Anxa1, Rara
GO:0044154	histone H3-K14 acetylation	4	2	0.04257	BP	Kmt2a, Brd4
GO:2000515	negative regulation of CD4-positive, alpha-beta T cell activation	5	2	0.04258	BP	Cd44, Anxa1
GO:0046184	aldehyde biosynthetic process	6	2	0.04259	BP	Pnpo, Bmp5
GO:0030832	regulation of actin filament length	33	3	0.04262	BP	Neb, Ssh1, Arfip1
GO:0006304	DNA modification	15	2	0.04268	BP	Gstt1, Kmt2a
GO:0005248	voltage-gated sodium channel activity	8	2	0.0427	MF	Cacna1g, Cacna1i
GO:0015485	cholesterol binding	8	2	0.0427	MF	Stard4, Cyp11a1
GO:0070577	lysine-acetylated histone binding	8	2	0.0427	MF	Kmt2a, Carm1
GO:0050803	regulation of synapse structure or activity	28	2	0.0428	BP	Ptprf, Ssh1
GO:0070971	endoplasmic reticulum exit site	8	2	0.0429	CC	Mia2, H2-Q10
GO:0043552	positive regulation of phosphatidylinositol 3-kinase activity	8	2	0.04298	BP	Vav2, Irs1
GO:0070098	chemokine-mediated signaling pathway	8	2	0.04298	BP	Ccl17, Ackr1
GO:0090004	positive regulation of establishment of protein localization to plasma membrane	8	2	0.04298	BP	Epha2, Clip3
GO:1902476	chloride transmembrane transport	8	2	0.04298	BP	Gabra2, Slc26a2

## Sheet: B6 sus-con DOWN mPFC
GO.ID	Term	Annotated	Significant	P	Category	Genes
GO:0019911	structural constituent of myelin sheath	6	5	5.7e-07	MF	Mal, Plp1, Pllp, Mobp, Mbp
GO:0005243	gap junction channel activity	3	3	6.4e-05	MF	Gjc2, Gjb1, Gjc3
GO:0043209	myelin sheath	88	15	0.00012	CC	Ndrg1, Cnp, Sept4, Myoc, Ermn, Tspan2, Plp1, Pllp, Mobp, Mag, Cldn11, Mbp, Gjc2, Gjc3, Mog
GO:0005922	connexin complex	5	3	0.00061	CC	Gjc2, Gjb1, Gjc3
GO:0014002	astrocyte development	11	4	0.00066	BP	Adora2a, Drd1, Tspan2, Plp1
GO:0032230	positive regulation of synaptic transmission, GABAergic	6	3	0.00115	BP	Kif5b, Adora2a, Tac1
GO:0035815	positive regulation of renal sodium excretion	6	3	0.00115	BP	Adora2a, Drd2, Tac1
GO:0045760	positive regulation of action potential	6	3	0.00115	BP	Pawr, Rapgef4, Tac1
GO:0042552	myelination	51	13	0.00127	BP	Ndrg1, Myoc, Mal, Tspan2, Cd9, Plp1, Pllp, Trf, Ugt8a, Mag, Nkx6-2, Mbp, Gjc3
GO:0019228	neuronal action potential	14	4	0.00182	BP	Drd1, Pawr, Rapgef4, Gpr88
GO:0008574	ATP-dependent microtubule motor activity, plus-end-directed	7	3	0.002	MF	Kif5b, Kif19a, Kif5a
GO:0097730	non-motile cilium	42	7	0.003	CC	Rgs9, Drd1, Prph, Plekhb1, Drd2, Ano2, Rapgef4
GO:0051482	positive regulation of cytosolic calcium ion concentration involved in phospholipase C-activating G-protein coupled signaling pathway	8	3	0.00305	BP	Drd1, Drd2, Lpar1
GO:0051496	positive regulation of stress fiber assembly	17	4	0.00393	BP	Myoc, Prkcq, Lpar1, Tac1
GO:0048812	neuron projection morphogenesis	192	13	0.00427	BP	Wnt3, Kif5b, Cnp, Adora2a, Thbs4, Draxin, Plxnb3, Drd2, Ugt8a, Mag, Isl1, Xlr3b, Kif5a
GO:0022010	central nervous system myelination	9	3	0.00443	BP	Plp1, Mag, Nkx6-2
GO:0031987	locomotion involved in locomotory behavior	9	3	0.00443	BP	Drd2, Rcan2, Gpr37
GO:0001968	fibronectin binding	9	3	0.0045	MF	Thbs4, Ccdc80, Myoc
GO:0044774	mitotic DNA integrity checkpoint	16	3	0.00463	BP	Top2a, D7Ertd443e, Clspn
GO:0008291	acetylcholine metabolic process	3	2	0.00465	BP	Chat, Slc5a7
GO:0021853	cerebral cortex GABAergic interneuron migration	3	2	0.00465	BP	Drd1, Drd2
GO:0030913	paranodal junction assembly	3	2	0.00465	BP	Cd9, Ugt8a
GO:0032224	positive regulation of synaptic transmission, cholinergic	3	2	0.00465	BP	Adora2a, Tac1
GO:0042136	neurotransmitter biosynthetic process	3	2	0.00465	BP	Chat, Slc5a7
GO:0042321	negative regulation of circadian sleep/wake cycle, sleep	3	2	0.00465	BP	Drd1, Drd2
GO:0051971	positive regulation of transmission of nerve impulse	3	2	0.00465	BP	Pawr, Rapgef4
GO:0060379	cardiac muscle cell myoblast differentiation	3	2	0.00465	BP	Myocd, Isl1
GO:0060456	positive regulation of digestive system process	3	2	0.00465	BP	Pawr, Tac1
GO:0090197	positive regulation of chemokine secretion	3	2	0.00465	BP	Il33, Mbp
GO:1903236	regulation of leukocyte tethering or rolling	3	2	0.00465	BP	Pawr, Ccl28
GO:0033269	internode region of axon	3	2	0.00472	CC	Ermn, Mbp
GO:0008017	microtubule binding	67	8	0.005	MF	Ndrg1, Kif5b, Kif19a, Kif22, Mid1, Casc1, Ccdc187, Kif5a
GO:0005871	kinesin complex	18	4	0.00503	CC	Kif5b, Kif19a, Kif22, Kif5a
GO:0005881	cytoplasmic microtubule	18	4	0.00503	CC	Gramd3, Mid1, Ckap2, Casc1
GO:0007193	adenylate cyclase-inhibiting G-protein coupled receptor signaling pathway	19	4	0.00601	BP	Cort, Drd2, Lpar1, Gpr37
GO:0001975	response to amphetamine	10	3	0.00615	BP	Adora2a, Drd1, Drd2
GO:0005184	neuropeptide hormone activity	10	3	0.0062	MF	Nts, Cort, Penk
GO:0030424	axon	175	16	0.00768	CC	Kif5b, Adora2a, Drd1, Chat, Prph, Slc5a7, Myoc, Ermn, Drd2, Pawr, Mag, Mbp, Penk, Rapgef4, Tac1, Kif5a
GO:0048709	oligodendrocyte differentiation	36	7	0.00789	BP	Cnp, Aspa, Tspan2, Plp1, Sox10, Mag, Nkx6-2
GO:0048520	positive regulation of behavior	7	3	0.00899	BP	Adora2a, Drd1, Penk
GO:0001766	membrane raft polarization	4	2	0.00906	BP	Mal, Pllp
GO:0019695	choline metabolic process	4	2	0.00906	BP	Chdh, Enpp6
GO:0021520	spinal cord motor neuron cell fate specification	4	2	0.00906	BP	Nkx6-2, Isl1
GO:0032753	positive regulation of interleukin-4 production	4	2	0.00906	BP	Il33, Prkcq
GO:0035810	positive regulation of urine volume	4	2	0.00906	BP	Adora2a, Drd2
GO:0050872	white fat cell differentiation	4	2	0.00906	BP	Scd1, Prdm16
GO:0051309	female meiosis chromosome separation	4	2	0.00906	BP	Top2a, Ncaph
GO:0060158	phospholipase C-activating dopamine receptor signaling pathway	4	2	0.00906	BP	Drd1, Drd2
GO:0099612	protein localization to axon	4	2	0.00906	BP	Mal, Ugt8a
GO:1904355	positive regulation of telomere capping	4	2	0.00906	BP	Nek2, Prkcq
GO:0008301	DNA binding, bending	4	2	0.0091	MF	Top2a, Hhex
GO:0033265	choline binding	4	2	0.0091	MF	Chat, Slc5a7
GO:0035253	ciliary rootlet	4	2	0.0092	CC	Kif5b, Kif5a
GO:0035749	myelin sheath adaxonal region	4	2	0.0092	CC	Cnp, Mag
GO:0007218	neuropeptide signaling pathway	22	4	0.01033	BP	Cort, Penk, Tac1, Gpr88
GO:0007405	neuroblast proliferation	16	4	0.0145	BP	Gh, Drd2, Sox10, Hhip
GO:0000987	core promoter proximal region sequence-specific DNA binding	100	7	0.0146	MF	Uhrf1, Myocd, Tfeb, Hhex, Sox10, Nkx6-2, Isl1
GO:0051393	alpha-actinin binding	9	3	0.0147	MF	Adora2a, Pdlim2, D7Ertd443e
GO:0002830	positive regulation of type 2 immune response	5	2	0.01471	BP	Il33, Ido1
GO:0010579	positive regulation of adenylate cyclase activity involved in G-protein coupled receptor signaling pathway	5	2	0.01471	BP	Adora2a, Drd1
GO:0030432	peristalsis	5	2	0.01471	BP	Drd1, Drd2
GO:1900273	positive regulation of long-term synaptic potentiation	5	2	0.01471	BP	Drd1, Drd2
GO:0035240	dopamine binding	5	2	0.0148	MF	Drd1, Drd2
GO:0005686	U2 snRNP	5	2	0.01492	CC	Snrpd1, Snrpb2
GO:0035748	myelin sheath abaxonal region	5	2	0.01492	CC	Cnp, Myoc
GO:0070469	respiratory chain	31	3	0.01493	CC	Cox6a2, ND2, ND3
GO:0001662	behavioral fear response	14	3	0.01658	BP	Drd1, Penk, Gng7
GO:0043679	axon terminus	67	6	0.0166	CC	Nts, Drd1, Prph, Drd2, Penk, Rapgef4
GO:0017080	sodium channel regulator activity	14	3	0.0167	MF	Sgk2, Scn4b, Fxyd3
GO:0043025	neuronal cell body	214	16	0.01825	CC	Nts, Adora2a, Drd1, Chat, Prph, Slc5a7, Ermn, Drd2, Brinp3, Pawr, Lpar1, Mbp, Penk, Rapgef4, Tac1, Kif5a
GO:0005615	extracellular space	350	22	0.02059	CC	Wnt3, Adamts4, Cnp, Gpx3, Cpm, Gh, Thbs4, Ccdc80, Il33, Myoc, Olfm3, Cd9, Mcam, Trf, Serpinb1a, Cfap58, Klk6, Ide, Serpina9, Dmkn, Tac1, Ccl28
GO:0001963	synaptic transmission, dopaminergic	9	3	0.02131	BP	Adora2a, Drd1, Drd2
GO:0007625	grooming behavior	6	2	0.02148	BP	Drd1, Drd2
GO:0032060	bleb assembly	6	2	0.02148	BP	Emp2, Lpar1
GO:0042219	cellular modified amino acid catabolic process	6	2	0.02148	BP	Aldh1l2, Chac2
GO:0048148	behavioral response to cocaine	6	2	0.02148	BP	Drd1, Drd2
GO:0008157	protein phosphatase 1 binding	6	2	0.0216	MF	Pawr, Sh3rf2
GO:0038036	sphingosine-1-phosphate receptor activity	6	2	0.0216	MF	S1pr5, Gpr6
GO:0005685	U1 snRNP	6	2	0.02179	CC	Snrpd1, Snrpb2
GO:0044853	plasma membrane raft	38	3	0.02185	CC	Drd1, Slc5a7, Mal
GO:0050714	positive regulation of protein secretion	80	9	0.02302	BP	Kif5b, Adora2a, Il33, Prkcq, Drd2, Aim2, Mbp, Isl1, Rapgef4
GO:0034707	chloride channel complex	16	3	0.02452	CC	Ttyh2, Ano2, Fxyd3
GO:0005815	microtubule organizing center	192	12	0.02821	CC	Ndrg1, Kif5b, Top2a, Tmem63a, Cenpf, Nek2, Prkcq, D7Ertd443e, Ckap2, Pclaf, Ccdc187, Ckap2l
GO:0055010	ventricular cardiac muscle tissue morphogenesis	17	3	0.02836	BP	Tnnt2, Tnni1, Isl1
GO:0030517	negative regulation of axon extension	12	3	0.02908	BP	Wnt3, Draxin, Mag
GO:0032461	positive regulation of protein oligomerization	7	2	0.02929	BP	Aim2, Ide
GO:0035025	positive regulation of Rho protein signal transduction	7	2	0.02929	BP	Lpar1, Abra
GO:0051968	positive regulation of synaptic transmission, glutamatergic	7	2	0.02929	BP	Adora2a, Drd1
GO:0005834	heterotrimeric G-protein complex	7	2	0.0297	CC	Rgs9, Gng7
GO:0007018	microtubule-based movement	74	7	0.03234	BP	Kif5b, Kif19a, Kif22, Ak7, Casc1, Spag16, Kif5a
GO:0009636	response to toxic substance	31	4	0.03361	BP	Cnp, Drd2, Mbp, Gjc2
GO:2000649	regulation of sodium ion transmembrane transporter activity	14	3	0.03779	BP	Kif5b, Scn4b, Fxyd3
GO:0001954	positive regulation of cell-matrix adhesion	16	3	0.03781	BP	Emp2, Myoc, Ccl28
GO:0045745	positive regulation of G-protein coupled receptor protein signaling pathway	8	2	0.03804	BP	Drd2, Klk6
GO:0070233	negative regulation of T cell apoptotic process	8	2	0.03804	BP	Prkcq, Ido1
GO:0007628	adult walking behavior	19	3	0.03812	BP	Drd1, Chat, Drd2
GO:0004864	protein phosphatase inhibitor activity	8	2	0.0382	MF	Ppp1r14a, Sh3rf2
GO:0060170	ciliary membrane	12	3	0.03829	CC	Drd1, Prph, Drd2
GO:0001750	photoreceptor outer segment	23	4	0.03847	CC	Rgs9, Prph, Plekhb1, Rapgef4
GO:0005614	interstitial matrix	8	2	0.03857	CC	Ccdc80, Abi3bp
GO:0033270	paranode region of axon	8	2	0.03857	CC	Ermn, Mag
GO:0070661	leukocyte proliferation	85	6	0.03969	BP	Cd4, Il33, Prkcq, Ido1, Pawr, Tac1
GO:0048265	response to pain	8	2	0.03987	BP	Thbs4, Tac1
GO:0004952	dopamine neurotransmitter receptor activity	4	2	0.0399	MF	Drd1, Drd2
GO:0070990	snRNP binding	4	2	0.0399	MF	Snrpd1, Snrpb2
GO:0004112	cyclic-nucleotide phosphodiesterase activity	11	2	0.04	MF	Cnp, Pde8a
GO:0016741	transferase activity, transferring one-carbon groups	65	3	0.0402	MF	Aldh1l2, Gatm, Mettl11b
GO:0007626	locomotory behavior	85	11	0.04194	BP	Cnp, Adora2a, Drd1, Chat, Ido1, Drd2, Rcan2, Gpr37, Penk, Gng7, Gpr88
GO:0002052	positive regulation of neuroblast proliferation	9	2	0.04764	BP	Drd2, Sox10
GO:0007026	negative regulation of microtubule depolymerization	9	2	0.04764	BP	Mid1, Ckap2
GO:0015758	glucose transport	34	3	0.04764	BP	Gh, Drd1, Fabp5
GO:0031643	positive regulation of myelination	9	2	0.04764	BP	Trf, Mag
GO:0043220	Schmidt-Lanterman incisure	9	2	0.04829	CC	Myoc, Mag
GO:0016021	integral component of membrane	1291	63	0.04874	CC	Tmbim1, Abhd1, Pigyl, Nmbr, 1700016L04Rik, Adora2a, Nipal4, Atp2a3, Drd1, Emp2, B3gnt5, Cd4, Slc5a7, Tmem63a, Mal, Tspan2, Fam198b, Olfm3, Ndst4, Cd9, Plekhb1, Plxnb3, Plp1, Pllp, Mcam, Drd2, Ugt8a, Acsl3, Ttyh2, Tmem98, Rnf13, Mag, Abcc12, Scd1, Galnt6, Cldn11, Ano2, Car14, Lpar1, Mboat1, Rnf122, Gpr37, Smco3, Gjc2, S1pr5, Scn4b, Mpeg1, Gpr6, Gjb1, Tmem252, Opalin, Fam205c, Tmem125, Gjc3, Fxyd3,…
GO:0060326	cell chemotaxis	72	5	0.04939	BP	Thbs4, Prkcq, Plxnb3, Lpar1, Ccl28

## Sheet: D2 sus-con UP mPFC
GO.ID	Term	Annotated	Significant	P	Category	Genes
GO:0008360	regulation of cell shape	15	5	0.0013	BP	Hpn, Fblim1, Anxa1, Syne3, Gm14137
GO:0031514	motile cilium	31	6	0.0019	CC	Dnah2, Dnah11, Anxa1, Fsip1, Catsperg2, Spag16
GO:0005201	extracellular matrix structural constituent	11	4	0.0026	MF	Fbln1, Col2a1, Fbn2, Prelp
GO:0005576	extracellular region	709	55	0.0041	CC	Cdh1, Mmp11, Hpn, Smo, Cp, Crabp2, Fbln1, Cd163, Tnfrsf22, Ppt2, Lbp, Nts, Gh, Scrn2, Bmp4, Col2a1, Serping1, Pi16, Fbn2, Anxa1, Fcgr2b, Il1a, Il6ra, Pappa, Angptl7, Pcolce, Sspo, Fgf16, Il13ra2, Angpt2, Ifi30, Plscr4, Tgfbi, Frmd7, Rpl10a, Fmod, Prelp, S100a10, Cpa6, Tom1, Wfikkn2, Myof, Upk1b, Klk6, Hbb-b2, Hbb-b1, Hbb-bs, Adamts19, Lgals4, Col8a2, Chia1, Hba-a1, Ehd2, Thbd, Wfdc3, Col6a5, Hist…
GO:0005901	caveola	19	5	0.0044	CC	Cdh1, Smo, Adrb2, Myof, Ehd2
GO:0001649	osteoblast differentiation	45	6	0.0056	BP	Smo, Epha2, Bmp4, Fbn2, Itga11, Sp7
GO:0006953	acute-phase response	7	3	0.006	BP	Cd163, Lbp, Il1a
GO:0007029	endoplasmic reticulum organization	7	3	0.006	BP	Trdn, Tmem170, Tram2
GO:0042383	sarcolemma	21	5	0.0069	CC	Anxa1, Plcb3, Pgm5, Adrb2, Flnc
GO:0032722	positive regulation of chemokine production	14	4	0.0075	BP	Lbp, Il1a, Il6ra, Chia1
GO:0008483	transaminase activity	3	2	0.0096	MF	Etnppl, Bcat2
GO:0015385	sodium:proton antiporter activity	3	2	0.0096	MF	Slc9a2, Slc9a4
GO:0016805	dipeptidase activity	3	2	0.0096	MF	Scrn2, Cndp1
GO:0031720	haptoglobin binding	3	2	0.0096	MF	Hbb-b1, Hbb-b2, Hbb-bs, Hba-a1
GO:0051380	norepinephrine binding	3	2	0.0096	MF	Adra2a, Adrb2
GO:0031018	endocrine pancreas development	12	5	0.0098	BP	Smo, Bmp4, Il6ra, Gipr, Mir7-1
GO:0048747	muscle fiber development	14	5	0.0098	BP	Smo, Bmp4, Wfikkn2, Flnc, Klhl41
GO:0051258	protein polymerization	24	6	0.0098	BP	Mx1, Avil, Lmod1, Gm14137, Ube2s, Arfip1
GO:0001810	regulation of type I hypersensitivity	3	2	0.0101	BP	Fcgr2b, Btk
GO:0002248	connective tissue replacement involved in inflammatory response wound healing	3	2	0.0101	BP	Clec10a, Il1a
GO:0002638	negative regulation of immunoglobulin production	3	2	0.0101	BP	Fcgr2b, Il13ra2
GO:0006493	protein O-linked glycosylation	3	2	0.0101	BP	Slc35c2, Gxylt2
GO:0060576	intestinal epithelial cell development	3	2	0.0101	BP	Cdh1, Mir7-1
GO:0060684	epithelial-mesenchymal cell signaling	3	2	0.0101	BP	Smo, Bmp4
GO:1904668	positive regulation of ubiquitin protein ligase activity	3	2	0.0101	BP	Plk1, Ube2s
GO:0005833	hemoglobin complex	3	2	0.0104	CC	Hbb-b1, Hbb-b2, Hbb-bs, Hba-a1
GO:0031838	haptoglobin-hemoglobin complex	3	2	0.0104	CC	Hbb-b1, Hbb-b2, Hbb-bs, Hba-a1
GO:0072659	protein localization to plasma membrane	27	6	0.0129	BP	Cdh1, Epha2, Fyb, P2ry1, S100a10, Ehd2
GO:0007193	adenylate cyclase-inhibiting G-protein coupled receptor signaling pathway	9	3	0.0132	BP	P2ry1, Adra2a, Htr5b
GO:0030857	negative regulation of epithelial cell differentiation	9	3	0.0132	BP	Smo, Il1a, Mir7-1
GO:0048821	erythrocyte development	9	3	0.0132	BP	Hbb-b2, Hbb-bs, Hbb-b1, Klf2, Hba-a1
GO:0004322	ferroxidase activity	4	2	0.0185	MF	Cp, Hephl1
GO:0019825	oxygen binding	4	2	0.0185	MF	Hbb-b1, Hbb-b2, Hbb-bs, Hba-a1
GO:0019841	retinol binding	4	2	0.0185	MF	Crabp2, Rbp1
GO:0030506	ankyrin binding	4	2	0.0185	MF	Cdh1, Flnc
GO:0051379	epinephrine binding	4	2	0.0185	MF	Adra2a, Adrb2
GO:0050708	regulation of protein secretion	71	9	0.0188	BP	Fbln1, Llgl1, Glp1r, Anxa1, Il1a, Gipr, Adra2a, Chia1, Arfip1
GO:0019897	extrinsic component of plasma membrane	29	4	0.0189	CC	Cdh1, Anxa1, Btk, S100a10
GO:0001696	gastric acid secretion	4	2	0.0194	BP	Slc9a4, Slc26a7
GO:0001780	neutrophil homeostasis	4	2	0.0194	BP	Anxa1, Fcgr2b
GO:0002029	desensitization of G-protein coupled receptor protein signaling pathway	4	2	0.0194	BP	Gipr, Adrb2
GO:0003337	mesenchymal to epithelial transition involved in metanephros morphogenesis	4	2	0.0194	BP	Smo, Bmp4
GO:0006825	copper ion transport	4	2	0.0194	BP	Cp, Hephl1
GO:0014850	response to muscle activity	4	2	0.0194	BP	Tns2, Perm1
GO:0030866	cortical actin cytoskeleton organization	4	2	0.0194	BP	Llgl1, Ehd2
GO:0032456	endocytic recycling	4	2	0.0194	BP	Fcgr2b, Ehd2
GO:0042590	antigen processing and presentation of exogenous peptide antigen via MHC class I	4	2	0.0194	BP	Tapbp, Ifi30
GO:0046475	glycerophospholipid catabolic process	4	2	0.0194	BP	Plcb3, Pla2g4c
GO:0050910	detection of mechanical stimulus involved in sensory perception of sound	4	2	0.0194	BP	Hpn, Chrna10
GO:0051451	myoblast migration	4	2	0.0194	BP	Smo, Anxa1
GO:0051693	actin filament capping	4	2	0.0194	BP	Avil, Lmod1
GO:0060272	embryonic skeletal joint morphogenesis	4	2	0.0194	BP	Bmp4, Col2a1
GO:0071711	basement membrane organization	4	2	0.0194	BP	Mmp11, Hpn
GO:0098719	sodium ion import across plasma membrane	4	2	0.0194	BP	Slc9a2, Slc9a4
GO:1901021	positive regulation of calcium ion transmembrane transporter activity	4	2	0.0194	BP	Trdn, Bmp4
GO:0060170	ciliary membrane	7	3	0.0198	CC	Smo, Cdhr1, Tmem231
GO:0032588	trans-Golgi network membrane	4	2	0.02	CC	Llgl1, Arfip1
GO:0032809	neuronal cell body membrane	4	2	0.02	CC	Il6ra, Adrb2
GO:0072562	blood microparticle	18	4	0.02	CC	Cp, Serping1, Hbb-b1, Hbb-b2, Hbb-bs, Hba-a1
GO:0005507	copper ion binding	19	4	0.0212	MF	Cp, Tyrp1, Il1a, Hephl1
GO:0035264	multicellular organism growth	35	7	0.0222	BP	Smo, Gh, Tns2, Adrb2, Klf2, Nespas, Pantr2
GO:0005615	extracellular space	260	26	0.0263	CC	Cp, Fbln1, Lbp, Gh, Bmp4, Col2a1, Serping1, Pi16, Anxa1, Il1a, Il6ra, Pappa, Pcolce, Angpt2, Tgfbi, Frmd7, Fmod, Prelp, Cpa6, Klk6, Hbb-b1, Hbb-bs, Hbb-b2, Lgals4, Chia1, Hba-a1, Thbd, Hist1h2bl
GO:0050830	defense response to Gram-positive bacterium	20	4	0.0275	BP	Epha2, Lbp, Pld1, Hist1h2bl
GO:0007166	cell surface receptor signaling pathway	401	34	0.0284	BP	Cdh1, Smo, Epha2, Tnfrsf22, Grid2ip, Lbp, Slc35c2, Il20ra, Bmp4, Col2a1, Glp1r, Fbn2, Anxa1, Fcgr2b, Il1a, P2ry1, Il6ra, Gipr, Fgf16, Btk, Angpt2, Tmem231, Itga11, Adra2a, Themis2, Lgr6, Wfikkn2, Adrb2, Npas4, Myof, Upk1b, Socs3, Dnaic1, Mir7-1
GO:0004935	adrenergic receptor activity	5	2	0.0296	MF	Adra2a, Adrb2
GO:0016918	retinal binding	5	2	0.0296	MF	Crabp2, Rbp1
GO:0030501	positive regulation of bone mineralization	12	3	0.0304	BP	Bmp4, Fbn2, Adrb2
GO:0071385	cellular response to glucocorticoid stimulus	9	3	0.0308	BP	Bmp4, Anxa1, Npas4
GO:0001829	trophectodermal cell differentiation	5	2	0.0311	BP	Cdh1, Tfap2c
GO:0002043	blood vessel endothelial cell proliferation involved in sprouting angiogenesis	5	2	0.0311	BP	Epha2, Bmp4
GO:0010923	negative regulation of phosphatase activity	5	2	0.0311	BP	Hpn, Sh2d4a
GO:0031649	heat generation	5	2	0.0311	BP	Il1a, Adrb2
GO:0045986	negative regulation of smooth muscle contraction	5	2	0.0311	BP	Adra2a, Adrb2
GO:0071880	adenylate cyclase-activating adrenergic receptor signaling pathway	5	2	0.0311	BP	Adra2a, Adrb2
GO:0033017	sarcoplasmic reticulum membrane	5	2	0.032	CC	Trdn, Klhl41
GO:0005925	focal adhesion	64	8	0.0362	CC	Fblim1, Epha2, Anxa1, Itga11, Tns2, Rpl10a, Pgm5, Flnc
GO:0005578	proteinaceous extracellular matrix	100	12	0.0372	CC	Mmp11, Fbln1, Bmp4, Col2a1, Fbn2, Tgfbi, Fmod, Prelp, Cpa6, Adamts19, Col8a2, Col6a5
GO:0030216	keratinocyte differentiation	18	4	0.0374	BP	Epha2, Anxa1, Il1a, Tfap2c
GO:0030426	growth cone	13	3	0.0393	CC	Smo, Arhgap4, Frmd7
GO:0010721	negative regulation of cell development	47	7	0.0437	BP	Fbln1, Tnfrsf22, Bmp4, Pi16, Il1a, Arhgap4, Sox21
GO:0071805	potassium ion transmembrane transport	23	4	0.0437	BP	Hpn, Slc9a2, Slc9a4, Kcnh8
GO:0008306	associative learning	11	3	0.0445	BP	Nts, Glp1r, Adrb2
GO:0007520	myoblast fusion	6	2	0.0448	BP	Myof, Ehd2
GO:0019886	antigen processing and presentation of exogenous peptide antigen via MHC class II	6	2	0.0448	BP	Fcgr2b, Ifi30
GO:0030889	negative regulation of B cell proliferation	6	2	0.0448	BP	Fcgr2b, Btk
GO:0046688	response to copper ion	6	2	0.0448	BP	Cp, Il1a
GO:2001259	positive regulation of cation channel activity	6	2	0.0448	BP	Trdn, Bmp4
GO:0007249	I-kappaB kinase/NF-kappaB signaling	43	3	0.0454	BP	Nfkb2, Il1a, Btk
GO:0051453	regulation of intracellular pH	14	3	0.0461	BP	Slc9a2, Slc9a4, Slc26a7
GO:0043209	myelin sheath	19	4	0.0474	CC	Cdh1, Llgl1, Hbb-b1, Hbb-b2, Hbb-bs, Hba-a1
GO:0031982	vesicle	593	38	0.0476	CC	Cdh1, Hpn, Smo, Cp, Crabp2, Tyrp1, Fbln1, Slc47a1, Ppt2, Lbp, Nts, Llgl1, Gh, Scrn2, Bmp4, Serping1, Pi16, Anxa1, Fcgr2b, Pld1, Pcolce, Btk, Plscr4, Tgfbi, Rpl10a, Slc26a7, Prelp, S100a10, Lgr6, Tom1, Adrb2, Myof, Upk1b, Hbb-b1, Hbb-b2, Hbb-bs, Hba-a1, Ehd2, Ubap1l, Hist1h2bl
GO:0005913	cell-cell adherens junction	14	3	0.0478	CC	Cdh1, Anxa1, Pgm5

## Sheet: D2 sus-con DOWN mPFC
GO.ID	Term	Annotated	Significant	P	Category	Genes
GO:0032982	myosin filament	4	3	0.00054	CC	Mybpc3, Myh3, Myh1
GO:0006879	cellular iron ion homeostasis	5	3	0.0013	BP	Tfrc, Hfe2, Erfe
GO:0005859	muscle myosin complex	5	3	0.00131	CC	Mybpc3, Myh2, Myh1
GO:0051650	establishment of vesicle localization	19	4	0.0027	BP	Syt2, Sec16b, Myo5c, Bloc1s5
GO:0070938	contractile ring	3	2	0.00791	CC	Pstpip1, Myh2
GO:0071546	pi-body	3	2	0.00791	CC	Tdrd1, Tdrd5
GO:1990712	HFE-transferrin receptor complex	3	2	0.00791	CC	Tfrc, Hfe2
GO:0042462	eye photoreceptor cell development	3	2	0.0081	BP	Pde6c, Prkci
GO:0043046	DNA methylation involved in gamete generation	3	2	0.0081	BP	Tdrd1, Tdrd5
GO:0031672	A band	10	3	0.01512	CC	Mybpc3, Myh2, Myh1
GO:0033391	chromatoid body	4	2	0.01528	CC	Tdrd1, Tdrd5
GO:0097512	cardiac myofibril	4	2	0.01528	CC	Mybpc3, Tnnt2
GO:0030199	collagen fibril organization	4	2	0.0156	BP	Col1a1, Mkx
GO:0043471	regulation of cellular carbohydrate catabolic process	4	2	0.0156	BP	Hsd11b1, Ppp1r3e
GO:0071480	cellular response to gamma radiation	4	2	0.0156	BP	Tspyl5, Yap1
GO:0051965	positive regulation of synapse assembly	11	3	0.0175	BP	Ube2v2, Slitrk2, Slitrk1
GO:0031225	anchored component of membrane	18	4	0.02158	CC	Gfra2, Hfe2, Nrn1, Omg
GO:0045930	negative regulation of mitotic cell cycle	26	3	0.0251	BP	Fap, Btg3, Hus1b
GO:0020037	heme binding	13	3	0.027	MF	Cyp3a13, Cyp2r1, Hba-a2
GO:0003779	actin binding	61	8	0.028	MF	Mybpc3, Adssl1, Myh3, Tnnt2, Kif18a, Pstpip1, Abra, Myh1
GO:0006936	muscle contraction	33	6	0.0349	BP	Mybpc3, Myh3, Chga, Tnnt2, Myh2, Myh1
GO:0008137	NADH dehydrogenase (ubiquinone) activity	6	2	0.035	MF	Ndufc2, ND3
GO:0060048	cardiac muscle contraction	13	3	0.0359	BP	Mybpc3, Chga, Tnnt2
GO:0043303	mast cell degranulation	6	2	0.0363	BP	Chga, Lat2
GO:0051930	regulation of sensory perception of pain	6	2	0.0363	BP	Grm3, Fam19a4
GO:0001948	glycoprotein binding	16	3	0.047	MF	Tfrc, Cd6, Hfe2
GO:0042169	SH2 domain binding	7	2	0.048	MF	Shcbp1, Lat2
GO:0005791	rough endoplasmic reticulum	7	2	0.04821	CC	Hsd11b1, Pcsk9
GO:0004842	ubiquitin-protein transferase activity	52	5	0.049	MF	Fbxo32, Ube2v2, Hecw2, Trim5, Asb18

## Sheet: B6 res-con UP BNST
GO.ID	Term	Annotated	Significant	P	Category	Genes
GO:0005615	extracellular space	504	53	8.5e-12	CC	Fap, Ltbp1, Prg4, Chrd, Ace2, Scube1, Igfbp4, Cxcl16, Ctgf, Moxd1, Tpo, Gh, Pcsk1, Crhbp, Thbs4, Nptxr, Ccdc80, Igfbp6, Lox, Pcsk5, Snca, Col3a1, F5, Olfm1, Col5a1, Pamr1, Dkk2, Hgf, Ptn, Mgp, Pglyrp1, Dkk3, Vegfc, Ccl17, Ldlr, Anxa2, Col12a1, Nov, Nrn1, Prss23, Vasn, Npnt, Bricd5, A2ml1, Bdnf, Tmc8, Hbb-bs, Hbb-b1, Hbb-b2, Hmgb2, Ntm, Ttr, Klk8, Rnls, Ppia
GO:0004252	serine-type endopeptidase activity	46	11	8.9e-07	MF	Fap, Pcsk1, Pcsk5, F5, Pamr1, Prss12, Hgf, Tmprss7, Prss56, Prss23, Klk8
GO:0005509	calcium ion binding	243	25	5.9e-06	MF	Calm1, Ltbp1, Pkd2l2, Scube1, Tpo, Thbs4, Efcab6, Snca, Pamr1, Necab3, Mgp, Cdh15, Ldlr, Anxa2, Syt1, Capsl, Cdh12, Npnt, Pla2g5, Hpcal4, Dlk2, Syt17, Cdh24, Myl4, Ninl
GO:0005178	integrin binding	40	8	0.00011	MF	Fap, Ctgf, Itgb3, Thbs4, Col3a1, Gpnmb, Nov, Npnt
GO:0008201	heparin binding	64	10	0.00014	MF	Chrd, Rspo3, Ctgf, Thbs4, Ccdc80, Col5a1, Gpnmb, Ptn, Pla2g5, Rtn4r
GO:0001968	fibronectin binding	16	5	0.00025	MF	Ctgf, Itgb3, Thbs4, Ccdc80, Plekha2
GO:0000188	inactivation of MAPK activity	5	3	0.00052	BP	Dusp3, Dusp4, Prkca
GO:0004994	somatostatin receptor activity	5	3	0.00053	MF	Sstr4, Sstr3, Sstr2
GO:0005044	scavenger receptor activity	19	5	0.0006	MF	Prg4, Cd163, Cxcl16, Prss12, Ackr2
GO:0048306	calcium-dependent protein binding	29	6	0.00069	MF	Calm1, Stx1a, Snap25, Mgp, Anxa2, Syt1
GO:0042923	neuropeptide binding	12	4	0.00083	MF	Npbwr1, Sstr4, Sstr3, Sstr2
GO:0021902	commitment of neuronal cell to specific neuron type in forebrain	6	3	0.001	BP	Fezf2, Tbr1, Satb2
GO:0031994	insulin-like growth factor I binding	6	3	0.00103	MF	Igfbp4, Itgb3, Igfbp6
GO:0030198	extracellular matrix organization	105	14	0.00105	BP	Fap, Ctgf, Itgb3, Ccdc80, Lox, Kazald1, Col3a1, Itga8, Col5a1, Dnajb6, Gm5917, Dmp1, Anxa2, Rxfp1, Npnt
GO:0001938	positive regulation of endothelial cell proliferation	34	6	0.00157	BP	Vip, Itgb3, Thbs4, Vegfc, Prkca, Hmgb2
GO:0005520	insulin-like growth factor binding	14	6	0.0017	MF	Igfbp4, Ctgf, Itgb3, Igfbp6, Kazald1, Nov
GO:0005604	basement membrane	65	8	0.0019	CC	Thbs4, Ccdc80, Col17a1, Col5a1, Ptn, Col4a5, Anxa2, Npnt
GO:0051321	meiotic cell cycle	99	5	0.00207	BP	Rsph1, Tdrd1, Nek2, Mns1, Mei1
GO:0008305	integrin complex	15	4	0.0021	CC	Itgb3, Itga8, Itgal, Npnt
GO:0001228	transcriptional activator activity, RNA polymerase II transcription regulatory region sequence-specific binding	125	13	0.00213	MF	Mef2c, Etv5, Fezf2, Eaf2, Nr4a2, Barx2, Egr2, Neurod6, Neurod2, Zfp750, Tcf4, Sox21, Foxd1
GO:0005576	extracellular region	1585	96	0.0022	CC	Fap, Ltbp1, Dusp3, Prg4, Chrd, Cd163, Ace2, Dstn, Scube1, Igfbp4, Cxcl16, Ywhah, Vip, Rspo3, Ctgf, Moxd1, Tpo, Itgb3, Gh, Pcsk1, Crhbp, Thbs4, Atad2, Nptxr, Ccdc80, Igfbp6, Acat2, Lox, Pcsk5, Col17a1, Kazald1, Snca, Col3a1, F5, Olfm1, Col5a1, Pamr1, Chgb, Ndrg3, Prss12, Dkk2, Stmn1, Hgf, Dmp1, Ptn, Mgp, Pglyrp1, Coro1a, Dkk3, Itgal, Col4a5, Vegfc, Ccl17, Cdh15, Olfm2, Ldlr, Anxa2, Col12a1, Nlrp3,…
GO:0005930	axoneme	53	7	0.0022	CC	Tctex1d2, Dnah12, Cenpf, Ak8, Mns1, Dnali1, Sept9
GO:0007187	G-protein coupled receptor signaling pathway, coupled to cyclic nucleotide second messenger	74	9	0.00255	BP	Vip, Itgb3, Npbwr1, Rxfp1, Sstr4, Adgrd1, Sstr3, Chrm3, Sstr2
GO:0007229	integrin-mediated signaling pathway	31	6	0.00259	BP	Ctgf, Itgb3, Pcsk5, Col3a1, Itga8, Itgal
GO:0031915	positive regulation of synaptic plasticity	8	3	0.00265	BP	Snap25, Ptgs2, Neurod2
GO:0032753	positive regulation of interleukin-4 production	8	3	0.00265	BP	Nlrp3, Il20rb, H2-T23
GO:0005614	interstitial matrix	8	3	0.0027	CC	Ccdc80, Kazald1, Mamdc2
GO:0048791	calcium ion-regulated exocytosis of neurotransmitter	17	4	0.0033	BP	Snap25, Syt1, Rims1, Syt17
GO:0071277	cellular response to calcium ion	17	4	0.0033	BP	Mef2c, Crhbp, Syt1, Neurod2
GO:0016486	peptide hormone processing	9	3	0.00386	BP	Ace2, Pcsk1, Pcsk5
GO:0008083	growth factor activity	53	7	0.00389	MF	Ctgf, Thbs4, Hgf, Ptn, Vegfc, Nov, Bdnf
GO:0031430	M band	9	3	0.0039	CC	Fhl2, Mybpc1, Myom3
GO:0001558	regulation of cell growth	185	16	0.00398	BP	Sertad1, Igfbp4, Cxcl16, Ctgf, Eaf2, Igfbp6, Kazald1, Olfm1, Syt1, Nov, Rims1, Rtn4r, Bdnf, Tmc8, Islr2, Syt17
GO:0046982	protein heterodimerization activity	235	18	0.00398	MF	Mef2c, Stx1a, Cybb, Scube1, Ywhah, Nr4a2, Hgf, Itgal, Kcnh5, Syt1, Neurod2, Nrn1, Dlk2, Tlr6, Tcf4, Ttr, H2-Q8, H2-Q6, Cenpw
GO:0002026	regulation of the force of heart contraction	18	4	0.00412	BP	Atp1a1, Prkca, Pde5a, Myl4
GO:0060047	heart contraction	87	8	0.00414	BP	Ace2, Trdn, Ctgf, Atp1a1, Prkca, Pde5a, Myl4, Rnls
GO:0001772	immunological synapse	18	4	0.0042	CC	Dusp3, Rhoh, Coro1a, Itgal
GO:0070495	negative regulation of thrombin-activated receptor signaling pathway	3	2	0.00422	BP	Snca, Stmn1
GO:0071603	endothelial cell-cell adhesion	3	2	0.00422	BP	Thbs4, Nov
GO:0072194	kidney smooth muscle tissue development	3	2	0.00422	BP	Tshz3, Osr1
GO:0072268	pattern specification involved in metanephros development	3	2	0.00422	BP	Osr1, Foxd1
GO:2000721	positive regulation of transcription from RNA polymerase II promoter involved in smooth muscle cell differentiation	3	2	0.00422	BP	Itga8, Npnt
GO:0035374	chondroitin sulfate binding	3	2	0.0043	MF	Ptn, Rtn4r
GO:0045545	syndecan binding	3	2	0.0043	MF	Chrd, Gpnmb
GO:0070032	synaptobrevin 2-SNAP-25-syntaxin-1a-complexin I complex	3	2	0.0043	CC	Stx1a, Snap25
GO:0070044	synaptobrevin 2-SNAP-25-syntaxin-1a complex	3	2	0.0043	CC	Stx1a, Snap25
GO:0001954	positive regulation of cell-matrix adhesion	19	4	0.00506	BP	Itgb3, Pcsk5, Vegfc, Plekha2
GO:0001956	positive regulation of neurotransmitter secretion	10	3	0.00536	BP	Stx1a, Snca, Rims1
GO:1903861	positive regulation of dendrite extension	10	3	0.00536	BP	Syt1, Rims1, Syt17
GO:0060079	excitatory postsynaptic potential	44	6	0.00726	BP	Mef2c, Stx1a, Snca, Rims1, Bdnf, Slc17a7
GO:0042056	chemoattractant activity	11	3	0.00736	MF	Hgf, Vegfc, Hmgb2
GO:0042417	dopamine metabolic process	22	4	0.00815	BP	Moxd1, Snca, Nr4a2, Rnls
GO:0010692	regulation of alkaline phosphatase activity	4	2	0.00823	BP	Mef2c, Npnt
GO:0023041	neuronal signal transduction	4	2	0.00823	BP	Olfm1, Rtn4r
GO:0060452	positive regulation of cardiac muscle contraction	4	2	0.00823	BP	Ace2, Ctgf
GO:1903960	negative regulation of anion transmembrane transport	4	2	0.00823	BP	Osr1, Prkca
GO:0048787	presynaptic active zone membrane	4	2	0.0083	CC	Stx1a, Snap25
GO:0070033	synaptobrevin 2-SNAP-25-syntaxin-1a-complexin II complex	4	2	0.0083	CC	Stx1a, Snap25
GO:0030199	collagen fibril organization	22	4	0.00873	BP	Lox, Col3a1, Col5a1, Anxa2
GO:0044325	ion channel binding	62	7	0.00925	MF	Calm1, Stx1a, Ywhah, Trdn, Snap25, Kcnh5, Rims1
GO:0034341	response to interferon-gamma	35	4	0.00928	BP	Cxcl16, Snca, Slc11a1, Ccl17
GO:0045956	positive regulation of calcium ion-dependent exocytosis	12	3	0.00929	BP	Stx1a, Syt1, Rims1
GO:0043005	neuron projection	545	33	0.0093	CC	Calm1, Ltbp1, Stx1a, Cybb, Tshz3, Crhbp, Pcsk5, Nptx1, Snca, Itga8, Olfm1, Snap25, Prss12, Stmn1, Slc30a3, Coro1a, Htr3a, Ptgs2, Npbwr1, Syt1, Sstr4, Nov, Rtn4r, Sstr3, Chrm3, Sstr2, Bdnf, Nrsn1, Rtn4rl2, Prkca, Sv2b, Ntm, Slc17a7
GO:0007160	cell-matrix adhesion	72	9	0.00943	BP	Ctgf, Itgb3, Pcsk5, Col3a1, Itga8, Itgal, Vegfc, Plekha2, Npnt
GO:0031594	neuromuscular junction	36	5	0.0113	CC	Thbs4, Ptn, Col4a5, Cdh15, Pdzrn3
GO:0010811	positive regulation of cell-substrate adhesion	54	8	0.01154	BP	Itgb3, Ccdc80, Pcsk5, Dmp1, Ptn, Vegfc, Plekha2, Npnt
GO:0010613	positive regulation of cardiac muscle hypertrophy	13	3	0.01174	BP	Mef2c, Prkca, Pde5a
GO:0006508	proteolysis	550	29	0.01265	BP	Fap, Uhrf1, Ace2, Ctgf, Usp43, Pcsk1, Pmaip1, Pcsk5, Snca, Cops5, Pamr1, Prss12, Hgf, Dnajb6, Gm5917, Cln6, Nlrp3, Tmprss7, Prss56, Adam32, Dtl, Prss23, Epop, A2ml1, Prss32, Trhde, Klk8, Trabd2b, Klhl40, Wfdc3
GO:0043195	terminal bouton	51	6	0.0127	CC	Snca, Snap25, Prss12, Syt1, Bdnf, Sv2b
GO:0051961	negative regulation of nervous system development	147	13	0.01285	BP	Chrd, Ywhah, Fezf2, Col3a1, Olfm1, Ptn, Neurod2, Rtn4r, Bdnf, Rtn4rl2, Ntm, Sox21, Klk8
GO:0044342	type B pancreatic cell proliferation	12	3	0.0133	BP	Igfbp4, Fmc1, Nov
GO:0010807	regulation of synaptic vesicle priming	5	2	0.01337	BP	Stx1a, Rims1
GO:0030299	intestinal cholesterol absorption	5	2	0.01337	BP	Acat2, Ldlr
GO:0031115	negative regulation of microtubule polymerization	5	2	0.01337	BP	Snca, Stmn1
GO:0031629	synaptic vesicle fusion to presynaptic active zone membrane	5	2	0.01337	BP	Stx1a, Snap25
GO:0048012	hepatocyte growth factor receptor signaling pathway	5	2	0.01337	BP	Stmn1, Hgf
GO:0048681	negative regulation of axon regeneration	5	2	0.01337	BP	Rtn4r, Klk8
GO:1900122	positive regulation of receptor binding	5	2	0.01337	BP	Anxa2, Bdnf
GO:1905809	negative regulation of synapse organization	5	2	0.01337	BP	Ptn, Neurod2
GO:2001223	negative regulation of neuron migration	5	2	0.01337	BP	Col3a1, Olfm1
GO:0042612	MHC class I protein complex	5	2	0.0135	CC	H2-T23, H2-Q6, H2-Q8
GO:0007611	learning or memory	120	14	0.01356	BP	Mef2c, Vip, Itga8, Snap25, Ptn, Ptgs2, Tbr1, Neurod2, Bdnf, Prkca, Pde5a, Nptx2, Klk8, Slc17a7
GO:0002062	chondrocyte differentiation	47	5	0.01378	BP	Mef2c, Ctgf, Nov, Osr1, Prkca
GO:0045666	positive regulation of neuron differentiation	176	12	0.01497	BP	Mef2c, Etv5, Fezf2, Hgf, Ptn, Syt1, Neurod2, Rims1, Bdnf, Islr2, Tcf4, Syt17
GO:0045944	positive regulation of transcription from RNA polymerase II promoter	424	27	0.01608	BP	Mef2c, Sertad1, Etv5, E2f7, Atad2, Eaf2, Cops5, Slc11a1, Itga8, Nr4a2, Barx2, Nlrp3, Tbr1, Egr2, Neurod6, Mical2, Neurod2, Satb2, Zfp750, Npnt, Osr1, Tcf4, Hmgb2, Bloc1s2, Sox21, Spag8, Foxd1
GO:0030018	Z disc	54	6	0.0165	CC	Fhl2, Mybpc1, Mypn, Dnajb6, Gm5917, Pdlim3, Igfn1
GO:0001657	ureteric bud development	46	5	0.01752	BP	Tshz3, Npnt, Osr1, Bdnf, Foxd1
GO:0051968	positive regulation of synaptic transmission, glutamatergic	15	3	0.01766	BP	Tshz3, Cckbr, Ptgs2
GO:0043548	phosphatidylinositol 3-kinase binding	15	3	0.01812	MF	Calm1, Coro1a, Atp1a1
GO:0006937	regulation of muscle contraction	80	9	0.019	BP	Ace2, Ctgf, Ptgs2, Atp1a1, Npnt, Chrm3, Sstr2, Prkca, Pde5a
GO:0048745	smooth muscle tissue development	10	4	0.01931	BP	Tshz3, Col3a1, Itga8, Osr1
GO:0031672	A band	15	5	0.0194	CC	Fhl2, Mybpc1, Myom3, Myl4, Klhl40
GO:0022038	corpus callosum development	10	3	0.01944	BP	Prdm8, Rtn4r, Rtn4rl2
GO:0016572	histone phosphorylation	6	2	0.01956	BP	Ccna2, Prkca
GO:0030432	peristalsis	6	2	0.01956	BP	Tshz3, Sstr2
GO:0031340	positive regulation of vesicle fusion	6	2	0.01956	BP	Anxa2, Syt1
GO:0032736	positive regulation of interleukin-13 production	6	2	0.01956	BP	Nlrp3, H2-T23
GO:1902667	regulation of axon guidance	6	2	0.01956	BP	Fezf2, Tbr1
GO:0034103	regulation of tissue remodeling	37	3	0.01958	BP	Itgb3, Thbs4, Gpnmb
GO:0008009	chemokine activity	6	2	0.01992	MF	Cxcl16, Ccl17
GO:0031995	insulin-like growth factor II binding	6	2	0.01992	MF	Igfbp4, Igfbp6
GO:0000977	RNA polymerase II regulatory region sequence-specific DNA binding	215	15	0.02043	MF	Mef2c, Etv5, E2f7, Fezf2, Eaf2, Satb1, Nr4a2, Barx2, Tbr1, Egr2, Neurod6, Neurod2, Tcf4, Sox21, Foxd1
GO:0001077	transcriptional activator activity, RNA polymerase II core promoter proximal region sequence-specific binding	89	8	0.02061	MF	Mef2c, Nr4a2, Egr2, Neurod6, Zfp750, Tcf4, Sox21, Foxd1
GO:0005886	plasma membrane	1771	88	0.0212	CC	Fap, Calm1, Uhrf1, Def6, Dusp3, Stx1a, Cd163, Etv5, Cybb, Ace2, Scube1, Ywhah, Trdn, Slc16a10, Tpo, Itgb3, Gh, Kcnv1, Nptxr, Pcsk5, Nptx1, Snca, Slc11a1, Itga8, Olfm1, Snap25, Prss12, Atp8b5, Slc30a3, Rhoh, Gpnmb, Coro1a, Itgal, Cckbr, Plekha2, Cdh15, Pdzd3, Olfm2, Ldlr, Anxa2, Htr3a, Ptgs2, Atp1a1, Tmprss7, Npbwr1, Rxfp1, Rhov, Kcnh5, Syt1, F630111L10Rik, P2ry14, Sstr4, Tmem97, Nrn1, Vasn, Cdh12…
GO:0032281	AMPA glutamate receptor complex	16	3	0.0215	CC	Olfm1, Olfm2, Nrn1
GO:0030141	secretory granule	116	15	0.0231	CC	Stx1a, Moxd1, Gh, Crhbp, Pcsk5, Snca, Slc11a1, F5, Enkur, Chgb, Atp8b5, Syt1, Bdnf, Rab4b, Spag8
GO:0030054	cell junction	546	31	0.0237	CC	Fap, Def6, Stx1a, Fhl2, Ywhah, Itgb3, Col17a1, Snca, Cops5, Itga8, Olfm1, Snap25, Slc30a3, Coro1a, Itgal, Pdzd3, Olfm2, Anxa2, Htr3a, Atp1a1, Syt1, Nov, Nrn1, Rims1, Basp1, Chrm3, Frmd6, Sv2b, Cdh24, Slc17a7, Ppia
GO:0005200	structural constituent of cytoskeleton	29	4	0.02377	MF	Mybpc1, Tuba8, Lor, Frmd6
GO:0010389	regulation of G2/M transition of mitotic cell cycle	31	4	0.02485	BP	Cenpf, Ccna2, Mbd4, Kcnh5
GO:0048169	regulation of long-term neuronal synaptic plasticity	17	3	0.02496	BP	Snca, Rims1, Bdnf
GO:0006936	muscle contraction	125	14	0.02535	BP	Ace2, Trdn, Ctgf, Mybpc1, Tshz3, Hsbp1, Ptgs2, Atp1a1, Npnt, Chrm3, Sstr2, Prkca, Pde5a, Myl4
GO:0044295	axonal growth cone	17	3	0.0254	CC	Olfm1, Snap25, Rtn4r
GO:0030516	regulation of axon extension	38	4	0.02655	BP	Olfm1, Rtn4r, Bdnf, Islr2
GO:0010579	positive regulation of adenylate cyclase activity involved in G-protein coupled receptor signaling pathway	7	2	0.0267	BP	Vip, Adgrd1
GO:0016045	detection of bacterium	7	2	0.0267	BP	Pglyrp1, Tlr6
GO:0035987	endodermal cell differentiation	7	2	0.0267	BP	Col5a1, Hsbp1
GO:0035988	chondrocyte proliferation	7	2	0.0267	BP	Ctgf, Nov
GO:0042744	hydrogen peroxide catabolic process	7	2	0.0267	BP	Tpo, Snca
GO:0008301	DNA binding, bending	7	2	0.02719	MF	Hmgb2, Foxd1
GO:0030881	beta-2-microglobulin binding	7	2	0.02719	MF	H2-T23, H2-Q6, H2-Q8
GO:0032036	myosin heavy chain binding	7	2	0.02719	MF	Stx1a, Coro1a
GO:0048407	platelet-derived growth factor binding	7	2	0.02719	MF	Col3a1, Col5a1
GO:0009314	response to radiation	177	5	0.02733	BP	Gh, Pmaip1, Col3a1, Mbd4, Dtl
GO:0001503	ossification	171	13	0.02799	BP	Mef2c, Chrd, Fhl2, Ctgf, Kazald1, Dmp1, Ptn, Mgp, Ptgs2, Egr2, Satb2, Npnt, Osr1
GO:0070374	positive regulation of ERK1 and ERK2 cascade	78	7	0.02835	BP	Ctgf, Itgb3, Gpnmb, Ccl17, Npnt, Pla2g5, Prkca
GO:0005901	caveola	47	5	0.0328	CC	Cdh15, Ldlr, Ptgs2, Atp1a1, Myof
GO:0032496	response to lipopolysaccharide	108	9	0.03393	BP	Mef2c, Cxcl16, Snca, Slc11a1, Ptgs2, Nlrp3, Palm3, Prkca, Hmgb2
GO:0051963	regulation of synapse assembly	42	4	0.03455	BP	Mef2c, Snca, Bdnf, Prkca
GO:0070555	response to interleukin-1	32	3	0.03469	BP	Snca, Ccl17, Prkca
GO:0010922	positive regulation of phosphatase activity	8	2	0.03471	BP	Mef2c, Npnt
GO:0031954	positive regulation of protein autophosphorylation	8	2	0.03471	BP	Gpnmb, Vegfc
GO:0034383	low-density lipoprotein particle clearance	8	2	0.03471	BP	Ldlr, Anxa2
GO:0050930	induction of positive chemotaxis	8	2	0.03471	BP	Vegfc, Prkca
GO:0071498	cellular response to fluid shear stress	8	2	0.03471	BP	Mef2c, Ptgs2
GO:0005583	fibrillar collagen trimer	8	2	0.0351	CC	Col3a1, Col5a1
GO:0005797	Golgi medial cisterna	8	2	0.0351	CC	Pcsk5, H2-Q6, H2-Q8
GO:0008180	COP9 signalosome	8	2	0.0351	CC	Cops5, Basp1
GO:0005041	low-density lipoprotein receptor activity	8	2	0.03534	MF	Cxcl16, Ldlr
GO:0071837	HMG box domain binding	8	2	0.03534	MF	Mef2c, Egr2
GO:0043043	peptide biosynthetic process	219	6	0.03567	BP	Pcsk1, Pcsk5, Bank1, Rpl37, Rpl37rt, Prkca, Hbb-b1, Hbb-b2, Hbb-bs
GO:0008076	voltage-gated potassium channel complex	33	4	0.036	CC	Calm1, Stx1a, Kcnv1, Snap25
GO:0008022	protein C-terminus binding	99	8	0.0361	MF	Ctgf, Cenpf, Coro1a, Pdzd3, Syt1, Hpcal4, Tcf4, Bloc1s2
GO:0032970	regulation of actin filament-based process	143	9	0.03769	BP	Mef2c, Dstn, Ctgf, Itgb3, Stmn1, Coro1a, Atp1a1, Frmd6, Cdc42ep5
GO:0002209	behavioral defense response	28	4	0.03778	BP	Mef2c, Cckbr, Neurod2, Bdnf
GO:0045989	positive regulation of striated muscle contraction	5	3	0.0378	BP	Ace2, Ctgf, Atp1a1
GO:0032410	negative regulation of transporter activity	19	3	0.03787	BP	Snca, Osr1, Prkca
GO:0072160	nephron tubule epithelial cell differentiation	4	2	0.03793	BP	Mef2c, Osr1
GO:0002323	natural killer cell activation involved in immune response	5	2	0.03794	BP	Pglyrp1, Coro1a
GO:0031947	negative regulation of glucocorticoid biosynthetic process	5	2	0.03794	BP	Dkk3, Atp1a1
GO:0042921	glucocorticoid receptor signaling pathway	6	2	0.03794	BP	Ywhah, Bdnf
GO:0045837	negative regulation of membrane potential	5	2	0.03794	BP	Pmaip1, Ptn
GO:0044546	NLRP3 inflammasome complex assembly	8	2	0.03795	BP	Nlrp3, Tlr6
GO:0072074	kidney mesenchyme development	8	2	0.03795	BP	Osr1, Foxd1
GO:0015874	norepinephrine transport	12	2	0.03797	BP	Stx1a, Snca
GO:0055069	zinc ion homeostasis	11	2	0.03797	BP	Slc30a3, Tmc8
GO:0098878	neurotransmitter receptor complex	28	4	0.038	CC	Olfm1, Olfm2, Htr3a, Nrn1
GO:0046209	nitric oxide metabolic process	29	2	0.03806	BP	Ptgs2, Tlr6
GO:0044843	cell cycle G1/S phase transition	105	4	0.03819	BP	E2f7, Ccna2, Gpnmb, Lsm11
GO:0033549	MAP kinase phosphatase activity	4	2	0.0383	MF	Dusp3, Dusp4
GO:0030496	midbody	50	5	0.0413	CC	Kif20a, Incenp, Cenpf, Nek2, Anxa2
GO:0045177	apical part of cell	159	7	0.0425	CC	Fap, Itgb3, Itga8, Pdzd3, Ldlr, Atp1a1, Prkca
GO:0008021	synaptic vesicle	78	9	0.0428	CC	Stx1a, Snca, Cops5, Snap25, Slc30a3, Syt1, Bdnf, Sv2b, Slc17a7
GO:0030282	bone mineralization	42	5	0.04303	BP	Mef2c, Ptn, Mgp, Ptgs2, Osr1
GO:0071229	cellular response to acid chemical	70	6	0.04305	BP	Mef2c, Col3a1, Ldlr, Anxa2, Osr1, Bdnf
GO:0050850	positive regulation of calcium-mediated signaling	13	3	0.04329	BP	Trdn, Itgal, Neurod2
GO:0008544	epidermis development	105	6	0.04343	BP	Satb1, Barx2, Ptgs2, Zfp750, Lor, Sox21
GO:0001502	cartilage condensation	9	2	0.04353	BP	Ctgf, Barx2
GO:0035335	peptidyl-tyrosine dephosphorylation	9	2	0.04353	BP	Dusp3, Dusp4
GO:0042416	dopamine biosynthetic process	9	2	0.04353	BP	Snca, Nr4a2
GO:0048490	anterograde synaptic vesicle transport	9	2	0.04353	BP	Ap3m2, Bloc1s2
GO:0051152	positive regulation of smooth muscle cell differentiation	9	2	0.04353	BP	Tshz3, Olfm2
GO:0071392	cellular response to estradiol stimulus	9	2	0.04353	BP	Crhbp, Sstr2
GO:2000310	regulation of NMDA receptor activity	9	2	0.04353	BP	Mef2c, Crhbp
GO:0031045	dense core granule	9	2	0.044	CC	Crhbp, Syt1
GO:0031091	platelet alpha granule	9	2	0.044	CC	Snca, F5
GO:0007059	chromosome segregation	136	6	0.04422	BP	Incenp, Cenpf, Nek2, Dsn1, Mei1, Cenpw
GO:0060076	excitatory synapse	21	3	0.0443	CC	Syt1, Ntm, Slc17a7
GO:0008307	structural constituent of muscle	9	2	0.04431	MF	Mybpc1, Pdlim3
GO:0042608	T cell receptor binding	9	2	0.04431	MF	H2-T23, H2-Q6, H2-Q8
GO:0051371	muscle alpha-actinin binding	9	2	0.04431	MF	Mybpc1, Mypn
GO:0004601	peroxidase activity	21	3	0.04475	MF	Tpo, Ptgs2, Hbb-b1, Hbb-b2, Hbb-bs
GO:0003714	transcription corepressor activity	68	6	0.04572	MF	E2f7, Hsbp1, Prdm8, Neurod2, Basp1, Tcf4
GO:0051930	regulation of sensory perception of pain	22	3	0.04919	BP	Vip, Cckbr, Nov
GO:0036126	sperm flagellum	38	5	0.0493	CC	Rsph1, Enkur, Ak8, Spata18, Mns1

## Sheet: B6 res-con DOWN BNST
GO.ID	Term	Annotated	Significant	P	Category	Genes
GO:0005887	integral component of plasma membrane	302	36	0.0007	CC	Glra1, Itgb2, Slc7a7, Has1, Insrr, Tnfrsf22, Slc22a4, Chrna2, Slc38a4, Slc4a9, Fas, Htr4, Fcgr2b, Slc2a5, Cckar, C130060K24Rik, Rhcg, Gabre, Has3, Itga11, Plscr1, Slco2a1, Tlr13, Slco4a1, Tlr4, Tnfrsf14, Kcnj12, Gpr149, Sstr5, Mpz, Ncf4, C5ar2, Chrm5, Kcne1l, Itga10, Pcdha2
GO:0007186	G-protein coupled receptor signaling pathway	210	25	0.0021	BP	Glra1, Adora2b, Ccl9, C3, Htr4, Cckar, Gabre, Lpar2, Gpr161, Ccr6, Gpr149, S1pr2, Npy5r, Prlhr, Cxcr4, Mc4r, Olfr690, Sstr5, Rxfp2, Olfr1393, Gpr179, Gpr174, C5ar2, Chrm5, Fzd10
GO:0009897	external side of plasma membrane	89	13	0.003	CC	Glra1, Cd44, Tnfrsf22, Cd86, Fas, Fcgr2b, Tlr2, Cd1d1, Tlr4, Tnfrsf14, Cxcr4, Cd59b, Muc16
GO:0006706	steroid catabolic process	6	3	0.0043	BP	Cyp39a1, Spp1, Hsd3b7
GO:0007155	cell adhesion	337	32	0.0043	BP	Itgb2, Has1, Stat5a, Cd44, Rac3, Myo1g, Nedd9, Ajuba, Col14a1, Cd86, Cd1d1, Tnc, Svep1, Spp1, Bmx, Has3, Itga11, Styk1, Tnfsf9, Cd84, Hlx, Tnfrsf14, Frem3, Gldn, Mpz, Cyp26b1, Cd59b, Sox13, Col4a3, Muc4, Itga10, Pcdha2
GO:0019835	cytolysis	6	3	0.0043	BP	Fgl2, Gzmm, Cd59b
GO:0033033	negative regulation of myeloid cell apoptotic process	6	3	0.0043	BP	Stat5a, Fcgr2b, Clec5a
GO:0042574	retinal metabolic process	6	3	0.0043	BP	Aldh1a2, Dhrs4, Rpe65
GO:0021983	pituitary gland development	12	4	0.0051	BP	Nkx2-1, Pax6, Isl1, Sox3
GO:0051865	protein autoubiquitination	12	4	0.0051	BP	Ube2t, Trim30a, Trim17, Bfar
GO:0001764	neuron migration	27	6	0.0083	BP	Nkx2-1, Lhx1, Pax6, Cckar, Aspm, Cxcr4
GO:0005886	plasma membrane	1058	95	0.0086	CC	Glra1, Itgb2, Slc7a7, Lcp2, Has1, Cd44, Insrr, Eps8l1, Lpo, Tnfrsf22, Stc1, Rac3, Adora2b, Gdpd2, Slc22a4, Myo1g, Nedd9, Susd3, Nkd2, Chrna2, Ajuba, Slc38a4, Cd86, H2-M5, Slc4a9, Trpm6, Fas, Myo1a, Htr4, Fcgr2b, Tlr2, Cd1d1, Rpe65, Gem, Bnc2, Slc2a5, Cckar, Gpc2, Tes, Clec5a, C130060K24Rik, Rhcg, Gabre, Bmx, Has3, Itga11, Plscr1, Plscr2, Slco2a1, Styk1, C330027C09Rik, Tlr13, Neu3, Tnfsf9, Nudt1, …
GO:0042104	positive regulation of activated T cell proliferation	8	3	0.0109	BP	Stat5a, Cd86, Tnfsf9
GO:0016922	ligand-dependent nuclear receptor binding	3	2	0.011	MF	Mecr, Isl1
GO:0016934	extracellular-glycine-gated chloride channel activity	3	2	0.011	MF	Glra1, Chrm5
GO:0050501	hyaluronan synthase activity	3	2	0.011	MF	Has1, Has3
GO:0098634	protein binding involved in cell-matrix adhesion	3	2	0.011	MF	Itga11, Itga10
GO:0021871	forebrain regionalization	11	3	0.0113	BP	Nkx2-1, Lhx1, Pax6
GO:0001964	startle response	3	2	0.0114	BP	Glra1, Npas1
GO:0008356	asymmetric cell division	3	2	0.0114	BP	Pax6, Aspm
GO:0032645	regulation of granulocyte macrophage colony-stimulating factor production	3	2	0.0114	BP	Cd84, Isl1
GO:0033029	regulation of neutrophil apoptotic process	3	2	0.0114	BP	Cd44, Fcgr2b
GO:1902166	negative regulation of intrinsic apoptotic signaling pathway in response to DNA damage by p53 class mediator	3	2	0.0114	BP	Bcl2l12, Cd44
GO:0009925	basal plasma membrane	9	3	0.0149	CC	Myo1a, Rhcg, C5ar2
GO:0006575	cellular modified amino acid metabolic process	42	7	0.0153	BP	Stat5a, Shmt1, Carnmt1, Gstm4, Plscr1, Slco4a1, Ethe1
GO:0032735	positive regulation of interleukin-12 production	12	4	0.0155	BP	Tlr2, Tnfsf9, Tlr4, Isl1
GO:0043005	neuron projection	173	17	0.0185	CC	Glra1, Tnfrsf22, Rac3, Ddc, Ngb, Fas, Myo1a, Mlph, Cckar, Avp, Kcnj12, Gpr149, Npy5r, Cxcr4, Sstr5, Gpr179, Naip6, Naip7
GO:0004983	neuropeptide Y receptor activity	4	2	0.021	MF	Npy5r, Prlhr
GO:0005031	tumor necrosis factor-activated receptor activity	10	3	0.021	MF	Tnfrsf22, Fas, Tnfrsf14
GO:0016620	oxidoreductase activity, acting on the aldehyde or oxo group of donors, NAD or NADP as acceptor	10	3	0.021	MF	Aldh1a2, Dhrs4, Suclg2
GO:0019957	C-C chemokine binding	4	2	0.021	MF	Ccr6, Cxcr4
GO:0006909	phagocytosis	48	6	0.0211	BP	Itgb2, Myo1g, C3, Fcgr2b, Pld4, Rab39
GO:0016324	apical plasma membrane	67	9	0.0211	CC	Cd44, Stc1, Slc22a4, Trpm6, Fas, Myo1a, Slc2a5, Rhcg, Muc4
GO:0030902	hindbrain development	31	5	0.0216	BP	Aldh1a2, Lhx1, Pax6, Lhx5, En2
GO:0048709	oligodendrocyte differentiation	21	4	0.0216	BP	Nkx2-1, Pax6, Tlr2, Cxcr4
GO:0022029	telencephalon cell migration	10	3	0.0217	BP	Nkx2-1, Cxcr4, Foxb1
GO:0072329	monocarboxylic acid catabolic process	17	3	0.0217	BP	Cyp39a1, Acat3, Cyp26b1
GO:0002865	negative regulation of acute inflammatory response to antigenic stimulus	4	2	0.0218	BP	Fcgr2b, Npy5r
GO:0006390	transcription from mitochondrial promoter	4	2	0.0218	BP	Mterf1a, Mterf2
GO:0021533	cell differentiation in hindbrain	4	2	0.0218	BP	Lhx1, Lhx5
GO:0021680	cerebellar Purkinje cell layer development	4	2	0.0218	BP	Lhx1, Lhx5
GO:0021697	cerebellar cortex formation	4	2	0.0218	BP	Lhx1, Lhx5
GO:0021937	cerebellar Purkinje cell-granule cell precursor cell signaling involved in regulation of granule cell precursor cell proliferation	4	2	0.0218	BP	Lhx1, Lhx5
GO:0032661	regulation of interleukin-18 production	4	2	0.0218	BP	Tlr2, Cd84
GO:0045086	positive regulation of interleukin-2 biosynthetic process	4	2	0.0218	BP	Stat5a, Cd1d1
GO:0046642	negative regulation of alpha-beta T cell proliferation	4	2	0.0218	BP	Cd44, Tnfrsf14
GO:0051970	negative regulation of transmission of nerve impulse	4	2	0.0218	BP	Glra1, Avp
GO:0060907	positive regulation of macrophage cytokine production	4	2	0.0218	BP	Tlr2, Tlr4
GO:0071850	mitotic cell cycle arrest	4	2	0.0218	BP	Ddias, Cdc14a
GO:0043154	negative regulation of cysteine-type endopeptidase activity involved in apoptotic process	24	6	0.0229	BP	Bcl2l12, Cd44, Avp, Sfn, Naip7, Naip6, Hspa1b
GO:0003924	GTPase activity	57	8	0.023	MF	Tubb6, Rac3, Rab32, Tubd1, Gem, Nudt1, Rab39, Igtp
GO:0031532	actin cytoskeleton reorganization	18	4	0.0233	BP	Insrr, Gdpd2, Cckar, S1pr2
GO:0042923	neuropeptide binding	11	3	0.027	MF	Gpr149, Mc4r, Sstr5
GO:0030593	neutrophil chemotaxis	23	4	0.0278	BP	Itgb2, Ccl9, Spp1, C5ar2
GO:0009954	proximal/distal pattern formation	11	3	0.0279	BP	Aldh1a2, Irx1, Cyp26b1
GO:0010575	positive regulation of vascular endothelial growth factor production	11	3	0.0279	BP	Adora2b, C3, Isl1
GO:0072687	meiotic spindle	5	2	0.0337	CC	Aspm, Shcbp1l
GO:0004984	olfactory receptor activity	5	2	0.034	MF	Olfr690, Olfr1393
GO:0008305	integrin complex	12	3	0.034	CC	Itgb2, Itga11, Itga10
GO:0030371	translation repressor activity	5	2	0.034	MF	Shmt1, Patl1
GO:0071723	lipopeptide binding	5	2	0.034	MF	Tlr2, Cd1d1
GO:0045576	mast cell activation	27	6	0.0342	BP	Lcp2, Adora2b, Plscr1, Styk1, Cd84, Tlr4
GO:0016055	Wnt signaling pathway	94	12	0.0343	BP	Cd44, Sfrp5, Nkd2, Tlr2, Rspo4, Aspm, Ndp, Kremen2, Isl1, Notum, Naip6, Naip7, Fzd10
GO:0030858	positive regulation of epithelial cell differentiation	18	4	0.0345	BP	Lhx1, Pax6, S1pr2, Sfn
GO:0045087	innate immune response	183	17	0.0345	BP	Stat5a, Ccl9, Cd86, C3, Tlr2, Cd1d1, Clec5a, Trim30a, Elf4, Bmx, Plscr1, Styk1, Tlr13, Cd84, Tlr4, Sp110, Naip6, Naip7
GO:0031047	gene silencing by RNA	22	4	0.0346	BP	Ajuba, Dnd1, Henmt1, Exd1
GO:0001696	gastric acid secretion	5	2	0.0348	BP	Cckar, Chrm5
GO:0002523	leukocyte migration involved in inflammatory response	5	2	0.0348	BP	Itgb2, Ccr6
GO:0002730	regulation of dendritic cell cytokine production	5	2	0.0348	BP	Tlr2, Tlr4
GO:0007214	gamma-aminobutyric acid signaling pathway	5	2	0.0348	BP	Htr4, Gabre
GO:0007252	I-kappaB phosphorylation	5	2	0.0348	BP	Tlr2, Tlr4
GO:0007625	grooming behavior	5	2	0.0348	BP	Avp, Mc4r
GO:0009437	carnitine metabolic process	5	2	0.0348	BP	Slc22a4, Bbox1
GO:0010839	negative regulation of keratinocyte proliferation	5	2	0.0348	BP	Cd109, Sfn
GO:0021527	spinal cord association neuron differentiation	5	2	0.0348	BP	Lhx1, Lhx5
GO:0021854	hypothalamus development	5	2	0.0348	BP	Sox3, Foxb1
GO:0021892	cerebral cortex GABAergic interneuron differentiation	5	2	0.0348	BP	Nkx2-1, Rac3
GO:0032693	negative regulation of interleukin-10 production	5	2	0.0348	BP	Fcgr2b, Cd84
GO:0032700	negative regulation of interleukin-17 production	5	2	0.0348	BP	Tlr2, Tlr4
GO:0042711	maternal behavior	5	2	0.0348	BP	Npas1, Avp
GO:0048385	regulation of retinoic acid receptor signaling pathway	5	2	0.0348	BP	Nr2c1, Cyp26b1
GO:0048665	neuron fate specification	5	2	0.0348	BP	Pax6, Isl1
GO:0050908	detection of light stimulus involved in visual perception	5	2	0.0348	BP	Rpe65, Gucy2f
GO:0051256	mitotic spindle midzone assembly	5	2	0.0348	BP	Kif23, Cdc14a
GO:0033674	positive regulation of kinase activity	114	6	0.0354	BP	Cd44, Ajuba, Pfkfb1, Lpar2, Tlr4, Fzd10
GO:0001709	cell fate determination	12	3	0.0355	BP	Pax6, Isl1, Cyp26b1
GO:0045335	phagocytic vesicle	13	3	0.0422	CC	Rab32, Pld4, Rab39
GO:0007154	cell communication	1248	97	0.0429	BP	Glra1, Itgb2, Nkx2-1, Lcp2, Bcl2l12, Stat5a, Cd44, Insrr, Nr2c1, Eps8l1, Derl3, Nuak2, Tnfrsf22, Aldh1a2, Rac3, Adora2b, Lhx1, Sfrp5, Ccl9, Myo1g, Nkd2, Chrna2, Ajuba, Cd86, C3, Fbn2, Fas, Sigirr, Htr4, Fcgr2b, Pax6, Tlr2, Rpe65, Gem, Murc, Tnc, Cckar, Gpc2, Lhx5, Trim30a, Fgf16, Gabre, Bmx, Asb11, Lpar2, Itga11, Plscr1, Rspo4, Styk1, Tlr13, Aspm, Tnfsf9, Nudt1, Avp, Cd84, Tlr4, Ndp, Kremen2, Gpr…
GO:0032715	negative regulation of interleukin-6 production	19	5	0.0434	BP	Trim30a, Cd84, Tlr4, C5ar2, Muc16
GO:0043565	sequence-specific DNA binding	217	17	0.044	MF	Nkx2-1, Stat5a, Nr2c1, Lhx1, Pax6, Lhx5, Elf4, En2, Hlx, Isl1, Klhl6, Sox3, Foxb1, Irx1, Sox13, Foxr2, Pou5f2
GO:0002755	MyD88-dependent toll-like receptor signaling pathway	13	3	0.0441	BP	Tlr2, Tlr13, Tlr4
GO:0045429	positive regulation of nitric oxide biosynthetic process	13	3	0.0441	BP	Itgb2, Tlr2, Tlr4
GO:0031252	cell leading edge	57	7	0.0479	CC	Eps8l1, Gdpd2, Myo1g, Ajuba, Myo1a, Bmx, Cxcr4
GO:0004866	endopeptidase inhibitor activity	39	8	0.048	MF	Itih3, Wfdc1, C3, Renbp, Avp, Serpinb6b, Cd109, Naip6, Naip7
GO:0000778	condensed nuclear chromosome kinetochore	6	2	0.0485	CC	Bub1b, Mis18bp1
GO:0001530	lipopolysaccharide binding	6	2	0.049	MF	Tlr2, Tlr4
GO:0008395	steroid hydroxylase activity	6	2	0.049	MF	Cyp39a1, Cyp3a13
GO:0017128	phospholipid scramblase activity	6	2	0.049	MF	Plscr1, Plscr2

## Sheet: B6 sus-con UP BNST
GO.ID	Term	Annotated	Significant	P	Category	Genes
GO:0005615	extracellular space	515	41	4.9e-08	CC	Angptl2, Prg4, Ubc, Rarres2, Hist1h2bc, Dcn, Gh, Sfrp4, Itm2b, Gsdmd, Ccdc80, App, Thbs2, Lox, Col3a1, Dbi, Fgf7, Cst3, Vcam1, Dkk2, Sparcl1, Pdap1, Pon3, Ptn, Cd9, Itgam, Stx4a, Cpe, Timm8b, Lrrc17, S100a13, Serpinb1a, Tmsb4x, Tpt1, B2m, Ttr, Klk8, Selenop, Hmgb1, Gm21596, Ppia, Muc16
GO:0008137	NADH dehydrogenase (ubiquinone) activity	19	8	5.1e-08	MF	Ndufa2, Ndufa12, ND1, ND2, ND4, ND5, ND6, Ndufaf2
GO:0004129	cytochrome-c oxidase activity	15	7	1.5e-07	MF	Cox6c, Cox7c, Cox7a2, Cox6a1, Cox5b, COX1, Cox7a1
GO:0022625	cytosolic large ribosomal subunit	42	10	5.9e-07	CC	Rpl22, Gm10045, Rpl21, Rpl37rt, Rpl37, Rpl37a, Rpl5, Rpl11, Rps12, LOC100044627, Rpl23, LOC100862455, Rpl31, Rpl36a
GO:0070469	respiratory chain	55	17	8.8e-07	CC	Ndufa2, Cox7c, Ndufa12, Uqcrb, Ndufs6, Gm3244, Gm3873, Ndufb4, Cox7a2, Cox6a1, Cox5b, ND1, ND2, COX1, ND4, ND5, ND6, CYTB, Cox7a1
GO:1990948	ubiquitin ligase inhibitor activity	4	4	9.8e-07	MF	Rpl5, Rpl11, Rps7, Rpl23, LOC100044627, LOC100862455
GO:0003735	structural constituent of ribosome	92	14	1e-06	MF	Rps24, Rps3a1, LOC105244208, Rps6, Rpl22, Rpl21, Gm10045, Rpl37, Rpl37rt, Rpl37a, Rpl5, Rpl11, Rps7, Rps12, Rps28, Rpl23, LOC100044627, LOC100862455, Rpl31
GO:1904667	negative regulation of ubiquitin protein ligase activity	6	4	1.4e-05	BP	Rpl5, Rpl11, Rps7, Rpl23, LOC100044627, LOC100862455
GO:0003723	RNA binding	927	62	1.7e-05	MF	Zmat2, Snrpd1, Ubc, Ikzf1, Dcn, Rtn4, Taf15, Ywhae, Luc7l3, Top2a, Pnn, Srsf5, Dek, Auh, Btf3, 2700060E02Rik, Rida, Eif2ak2, Eif3a, Rps24, Atp5c1, Eif5b, Ncl, Dars, Rps3a1, Rps6, LOC105244208, Rpl22, Pdap1, Pop4, Mki67, Aff2, Scg3, Upf3b, Paip2, Mrps28, Smc1a, Pum3, Gm10045, Rpl21, Rpl37, Rpl37rt, Ppig, Zrsr1, Rpl37a, Ddx10, Eif3k, Npm1, Snrpg, Rpl5, Rpl11, Tpt1, Rps7, Rps12, Nol7, Hmgb1, Gm21596…
GO:0009055	electron carrier activity	36	13	3e-05	MF	Etfb, Cox6c, Cybb, Cox7c, Ndufa12, Cox7a2, Cox6a1, Cox5b, Aox1, COX1, CYTB, Ndufaf2, Cox7a1
GO:2000435	negative regulation of protein neddylation	3	3	3.1e-05	BP	Rpl5, Rpl11, Cops9
GO:0006123	mitochondrial electron transport, cytochrome c to oxygen	7	4	3.2e-05	BP	Cox7c, Cox6a1, Cox5b, COX1
GO:2000059	negative regulation of protein ubiquitination involved in ubiquitin-dependent protein catabolic process	7	4	3.2e-05	BP	Rpl5, Rpl11, Rps7, Rpl23, LOC100044627, LOC100862455
GO:0005751	mitochondrial respiratory chain complex IV	9	4	0.00012	CC	Cox7c, Cox6a1, Cox5b, COX1
GO:0070062	extracellular exosome	1347	66	0.0002	CC	Ift20, Rac1, Ggct, Angptl2, Etfb, Ubc, Rarres2, Gltp, Bcas1, Psma2, Hist1h2bc, Hint1, Rtn4, Ywhae, Itm2b, Rida, Gm3244, Ndufb4, Gm3873, App, Acat2, Fth1, Ifitm3, Atp5c1, Gsta3, Ncl, Dars, Dbi, Glul, Cst3, Gnas, Vcam1, Bdh2, Rpl22, Sparcl1, Pon3, Dera, Cd9, Itgam, Stx4a, Cox7a2, Atp5h, Rnase1, Cldn11, Cpe, S100a13, Serpinb1a, Clec14a, Rpl37a, Creb5, Eif3k, Rpl5, Rpl11, Tpt1, B2m, Rps7, Ttr, Aox1, …
GO:0008201	heparin binding	66	9	0.00021	MF	Ccdc80, App, Thbs2, Fgf7, Mdk, Rpl22, Ptn, Itgam, Col13a1
GO:0042274	ribosomal small subunit biogenesis	41	5	0.00029	BP	Rps24, LOC105244208, Rps6, Npm1, Rps7, Rps28
GO:0022627	cytosolic small ribosomal subunit	31	6	0.00039	CC	Rps24, Rps3a1, Rps6, LOC105244208, Rps7, Rps12, Rps28
GO:0031996	thioesterase binding	6	3	0.00059	MF	Rac1, Traf1, Haus7
GO:0043292	contractile fiber	114	6	0.00061	CC	Mybpc1, Mypn, Dek, Dbi, Cst3, Nexn
GO:0006810	transport	2278	73	0.00064	BP	Tmigd3, Adora3, Ift20, Rac1, Cdkn1b, Etfb, Slc1a3, Ranbp1, Rarres2, Gltp, Ndufa2, Pkd2l2, Cybb, Trdn, Ndufa12, Mybpc1, Rtn4, Gh, Ywhae, Sfrp4, Uqcrb, Ndufs6, Btf3, Tomm22, Smdt1, Gsdmd, Hcls1, App, Acat2, Bambi, Fth1, Ifitm3, Atp5c1, Ncl, Dbi, Glul, Fgf7, Gnas, Ect2, Cd9, Stx4a, Ccdc22, Tmem184c, Atp5h, Timm8b, Mbp, S100a13, Selenok, Dynlrb1, Atp5k, Cited1, Atpif1, Immp2l, Npm1, Rit2, Rpl11, Cd30…
GO:0006979	response to oxidative stress	192	11	0.00092	BP	Ndufa12, Gpx8, Gm3244, Gm3873, Ndufb4, App, Cst3, Ect2, Stx4a, Selenok, Rnf7, ND1, COX1
GO:0005604	basement membrane	48	8	0.00101	CC	Ccdc80, Thbs2, Smc3, Cst3, Ptn, Col4a6, P3h2, Col4a4
GO:0005753	mitochondrial proton-transporting ATP synthase complex	12	5	0.00101	CC	Atp5c1, Atp5h, Atp5k, Atpif1, Usmg5
GO:0005739	mitochondrion	924	61	0.00106	CC	Cwc15, Etfb, Slc1a3, Ndufa2, Cox6c, Cybb, Cox7c, Ndufa12, Gh, Ywhae, 2010107E04Rik, Auh, Uqcrb, Ndufs6, Rida, Tomm22, Smdt1, Gm3873, Ndufb4, Gm3244, Hcls1, Acat2, Fth1, Cbr2, Atp5c1, Acadl, Dbi, Glul, Cox20, Rad51, Dctn6, Cox7a2, Mobp, Atp5h, Apopt1, Timm8b, Mrps28, Cox6a1, Lyrm2, Minos1, Atp5k, Atpif1, Immp2l, Smim4, Cox5b, Nol7, ND1, ND2, COX1, ND4, ND5, ND6, CYTB, Ndufaf2, Gm15776, Gng5, Gm132…
GO:0006412	translation	327	25	0.00142	BP	Rida, App, Eif2ak2, Eif3a, Rps24, Eif5b, Ncl, Dars, Rps3a1, Rpl22, Upf3b, Paip2, Pum3, Gm10045, Rpl21, Rpl37, Rpl37rt, Rpl37a, Eif3k, Npm1, Rpl5, Rpl11, Rps7, Rps28, Ssb, Rpl23, LOC100044627, LOC100862455, Rpl31
GO:0005747	mitochondrial respiratory chain complex I	27	5	0.00149	CC	Ndufa2, Ndufa12, Ndufs6, Gm3244, Gm3873, Ndufb4, ND1
GO:0019911	structural constituent of myelin sheath	8	3	0.00156	MF	Plp1, Mobp, Mbp
GO:0043209	myelin sheath	149	13	0.00185	CC	Ubc, Rtn4, Atp5c1, Glul, Stx4a, Plp1, Mobp, Atp5h, Cldn11, Mbp, Cox6a1, Cox5b, Ppia
GO:0006364	rRNA processing	91	10	0.00291	BP	Rps24, Ncl, Rps6, LOC105244208, Pop4, Npm1, Rpl5, Rpl11, Rps7, Rps28, Pin4, LOC105247253
GO:0030854	positive regulation of granulocyte differentiation	3	2	0.00292	BP	Ikzf1, Hcls1
GO:1902548	negative regulation of cellular response to vascular endothelial growth factor stimulus	3	2	0.00292	BP	Dcn, Adamts12
GO:0030280	structural constituent of epidermis	3	2	0.00294	MF	Lor, Sprr1a
GO:0036033	mediator complex binding	3	2	0.00294	MF	Smc3, Smc1a
GO:0030893	meiotic cohesin complex	3	2	0.00302	CC	Smc3, Smc1a
GO:0006120	mitochondrial electron transport, NADH to ubiquinone	10	3	0.00318	BP	Ndufs6, ND2, ND4
GO:2000778	positive regulation of interleukin-6 secretion	11	3	0.00426	BP	Ncl, Mbp, Selenok
GO:0097602	cullin family protein binding	11	3	0.00429	MF	Gm9840, Rbx1, Ccdc22, Rnf7
GO:0015986	ATP synthesis coupled proton transport	15	4	0.0055	BP	Atp5c1, Atp5h, Atp5k, Cox5b
GO:0048027	mRNA 5'-UTR binding	12	3	0.00559	MF	Ncl, Rpl5, Rps7
GO:0010838	positive regulation of keratinocyte proliferation	4	2	0.00572	BP	Trp63, Fgf7
GO:0045409	negative regulation of interleukin-6 biosynthetic process	4	2	0.00572	BP	Prg4, Muc16
GO:0071107	response to parathyroid hormone	4	2	0.00572	BP	Gnas, Cited1
GO:0005685	U1 snRNP	12	3	0.00581	CC	Snrpd1, Luc7l3, Snrpg
GO:0097526	spliceosomal tri-snRNP complex	20	3	0.00589	CC	Zmat2, Snrpd1, Snrpg
GO:0005587	collagen type IV trimer	4	2	0.00591	CC	Col4a6, Col4a4
GO:0009897	external side of plasma membrane	123	10	0.00612	CC	Spa17, Il7r, Cd163, Vcam1, Cd9, Itgam, Clec14a, B2m, Ly6c1, Muc16
GO:0045071	negative regulation of viral genome replication	25	4	0.00731	BP	Eif2ak2, Fam111a, Ifitm3, Isg15
GO:0003729	mRNA binding	123	12	0.00758	MF	Luc7l3, Auh, Eif3a, Ncl, Rps3a1, Rps6, LOC105244208, Upf3b, Paip2, Pum3, Rpl5, Rps7, Ssb
GO:0010835	regulation of protein ADP-ribosylation	5	2	0.00934	BP	Hpf1, Pum3
GO:0032876	negative regulation of DNA endoreduplication	5	2	0.00934	BP	Smc3, Smc1a
GO:0046322	negative regulation of fatty acid oxidation	5	2	0.00934	BP	Acadl, Dbi
GO:0060770	negative regulation of epithelial cell proliferation involved in prostate gland development	5	2	0.00934	BP	Cdkn1b, Eaf2
GO:0075522	IRES-dependent viral translational initiation	5	2	0.00934	BP	Eif3a, Ssb
GO:2000172	regulation of branching morphogenesis of a nerve	5	2	0.00934	BP	Rtn4, Cpe
GO:0008121	ubiquinol-cytochrome-c reductase activity	5	2	0.00938	MF	Uqcrb, CYTB
GO:0016892	endoribonuclease activity, producing 3'-phosphomonoesters	5	2	0.00938	MF	Rida, Rnase1
GO:0050815	phosphoserine binding	5	2	0.00938	MF	Ywhae, Leo1
GO:0070652	HAUS complex	5	2	0.00964	CC	Haus4, Haus7
GO:0005737	cytoplasm	5465	203	0.01016	CC	Ift20, Pfdn5, Rac1, Spa17, Snrpd1, Ggct, Cdkn1b, Cwc15, Etfb, Slc1a3, Ranbp1, Ubc, Gltp, Bcas1, Ndufa2, Cox6c, Cybb, Psma2, Fli1, Dbndd2, Cox7c, Hist1h2bc, Ikzf1, Trdn, Sept10, Ube2d1, Dcn, Ndufa12, Mybpc1, Mypn, Hint1, Rtn4, Taf15, Gh, Trim47, Ywhae, Top2a, Pnn, 2010107E04Rik, Sfrp4, Dek, Aspn, Auh, Uqcrb, Gkap1, Ndufs6, Btf3, 2700060E02Rik, Itm2b, Haus4, Rida, Stk3, Rbx1, Gm9840, Tomm22, Smdt1,…
GO:0050821	protein stabilization	95	8	0.01016	BP	Rtn4, Stk3, Hypk, Npm1, Rpl5, Rpl11, Rps7, Rpl23, LOC100044627, LOC100862455
GO:0071011	precatalytic spliceosome	15	3	0.01119	CC	Snrnp27, Snrpd1, Snrpg
GO:0005746	mitochondrial respiratory chain	49	12	0.01333	CC	Ndufa2, Cox7c, Ndufa12, Uqcrb, Ndufs6, Gm3873, Gm3244, Ndufb4, Cox7a2, Cox6a1, Cox5b, ND1, COX1, Cox7a1
GO:0018149	peptide cross-linking	11	3	0.01364	BP	Dcn, Col3a1, Sprr1a
GO:0046931	pore complex assembly	6	2	0.01372	BP	Rtn4, Gsdmd
GO:0048012	hepatocyte growth factor receptor signaling pathway	6	2	0.01372	BP	Rac1, Adamts12
GO:1902255	positive regulation of intrinsic apoptotic signaling pathway by p53 class mediator	6	2	0.01372	BP	Rpl11, Rps7
GO:0070180	large ribosomal subunit rRNA binding	6	2	0.01378	MF	Rpl37a, Rpl23, LOC100044627, LOC100862455
GO:1990446	U1 snRNP binding	6	2	0.01378	MF	Snrpd1, Snrpg
GO:0001533	cornified envelope	6	2	0.01415	CC	Lor, Sprr1a
GO:0060091	kinocilium	6	2	0.01415	CC	Ift20, Rac1
GO:0007126	meiotic nuclear division	77	6	0.01511	BP	Top2a, Smc3, Rad51, Mki67, Smc1a, Spdya
GO:0005925	focal adhesion	229	14	0.01565	CC	Rac1, Ywhae, Rpl22, Cd9, Nexn, Rpl37a, Npm1, Rpl5, B2m, Rps7, Rpl23, LOC100044627, LOC100862455, Ppia, Rpl31, Ywhaq
GO:0032760	positive regulation of tumor necrosis factor production	40	5	0.01733	BP	Cybb, Ly96, Ncl, Selenok, Hmgb1, Gm21596
GO:0072593	reactive oxygen species metabolic process	117	6	0.01794	BP	Cybb, Pon3, Atpif1, Immp2l, ND2, Ndufaf2
GO:0097193	intrinsic apoptotic signaling pathway	152	9	0.01849	BP	Hint1, Trp63, Eaf2, Apopt1, Selenok, Rnf7, Rpl11, Tpt1, Rps7
GO:0050718	positive regulation of interleukin-1 beta secretion	7	2	0.01881	BP	Gsdmd, Hmgb1, Gm21596
GO:0048407	platelet-derived growth factor binding	7	2	0.01889	MF	Col3a1, Pdap1
GO:0000276	mitochondrial proton-transporting ATP synthase complex, coupling factor F(o)	7	2	0.0194	CC	Atp5h, Atp5k
GO:0046914	transition metal ion binding	623	17	0.01952	MF	Zmat2, Trim47, Rida, Rbx1, Gm9840, App, Lox, Fth1, Glul, Traf1, Cpe, P3h2, S100a13, Adamts12, Rnf7, Aox1, COX1, Cyp4v3
GO:0031012	extracellular matrix	247	22	0.0201	CC	Rac1, Rarres2, Dcn, Aspn, Ccdc80, Thbs2, Lox, Smc3, Col3a1, Cst3, Rpl22, Sparcl1, Ptn, Col4a6, P3h2, Clec14a, Adamts12, Rpl11, Rps7, Col4a4, Mfap1a, Rpl23, LOC100044627, LOC100862455
GO:0000082	G1/S transition of mitotic cell cycle	97	7	0.02121	BP	Cdkn1b, Ranbp1, E2f7, Trp63, Anp32b, Rps6, LOC105244208, Spdya
GO:0006635	fatty acid beta-oxidation	36	6	0.02333	BP	Etfb, Auh, Acat2, Acadl, Dbi, Bdh2
GO:0009611	response to wounding	213	11	0.02345	BP	Slc1a3, Srsf5, Lox, Col3a1, Fgf7, Mdk, Gnas, 5430416O09Rik, Klk8, Hmgb1, Gm21596, Muc16
GO:0004860	protein kinase inhibitor activity	56	5	0.02373	MF	Cdkn1b, Dcn, Aspn, Dusp19, Npm1
GO:0021799	cerebral cortex radially oriented cell migration	26	3	0.02449	BP	Rac1, Rtn4, Rnf7
GO:0033194	response to hydroperoxide	8	2	0.02456	BP	Stx4a, ND1
GO:0048739	cardiac muscle fiber development	8	2	0.02456	BP	Mypn, Nexn
GO:0008284	positive regulation of cell proliferation	430	23	0.02844	BP	Cdkn1b, Rtn4, Trp63, Hcls1, Bambi, Glul, Fgf7, Cst3, Gnas, Vcam1, Rps3a1, Anp32b, Ptn, Stx4a, Prc1, S100a13, Selenok, Spdya, Npm1, Gm21596, Hmgb1, Gm15776, Gng5, LOC100862455, Rpl23, LOC100044627, Cops9
GO:0022904	respiratory electron transport chain	46	14	0.02869	BP	Slc1a3, Cox7c, Ndufa12, Uqcrb, Ndufs6, Cox6a1, Immp2l, Cox5b, ND2, COX1, ND4, ND5, CYTB, Ndufaf2
GO:0042773	ATP synthesis coupled electron transport	34	11	0.03056	BP	Cox7c, Ndufa12, Uqcrb, Ndufs6, Cox6a1, Cox5b, ND2, COX1, ND4, ND5, CYTB
GO:0006122	mitochondrial electron transport, ubiquinol to cytochrome c	9	2	0.03093	BP	Uqcrb, CYTB
GO:0010998	regulation of translational initiation by eIF2 alpha phosphorylation	9	2	0.03093	BP	Eif2ak2, Npm1
GO:0031424	keratinization	9	2	0.03093	BP	Lor, Sprr1a
GO:0033539	fatty acid beta-oxidation using acyl-CoA dehydrogenase	9	2	0.03093	BP	Etfb, Acadl
GO:0090197	positive regulation of chemokine secretion	9	2	0.03093	BP	Mbp, Selenok
GO:0008097	5S rRNA binding	9	2	0.03106	MF	Rpl5, Rpl11
GO:0016595	glutamate binding	9	2	0.03106	MF	Slc1a3, Glul
GO:0046933	proton-transporting ATP synthase activity, rotational mechanism	9	2	0.03106	MF	Atp5c1, Atp5h
GO:0051371	muscle alpha-actinin binding	9	2	0.03106	MF	Mybpc1, Mypn
GO:0044764	multi-organism cellular process	223	12	0.03113	BP	Top2a, Gsdmd, Eif2ak2, Fam111a, Smc3, Eif3a, Ifitm3, Vcam1, Isg15, Selenok, Ssb, Ppia
GO:0032875	regulation of DNA endoreduplication	6	3	0.03139	BP	E2f7, Smc3, Smc1a
GO:0007160	cell-matrix adhesion	104	5	0.0314	BP	Rac1, Col3a1, Vcam1, Adamts12, Col13a1
GO:0044550	secondary metabolite biosynthetic process	6	2	0.0315	BP	Bdh2, Cited1
GO:1903019	negative regulation of glycoprotein metabolic process	7	2	0.03151	BP	Itm2b, Cst3
GO:1902751	positive regulation of cell cycle G2/M phase transition	14	2	0.03153	BP	App, Npm1
GO:0099512	supramolecular fiber	452	19	0.03169	CC	Rac1, Dcn, Mybpc1, Mypn, Dek, Haus4, Eif3a, Col3a1, Dbi, Bfsp1, Cst3, Cald1, Haus7, Mns1, Dnah17, Prc1, Nexn, Dynlrb1, Mfap1a
GO:0016052	carbohydrate catabolic process	66	2	0.03172	BP	Dera, Hmgb1, Gm21596
GO:0005687	U4 snRNP	9	2	0.03187	CC	Snrpd1, Snrpg
GO:0097449	astrocyte projection	9	2	0.03187	CC	App, Gjb2
GO:0045275	respiratory chain complex III	8	2	0.03203	CC	Uqcrb, CYTB
GO:0009060	aerobic respiration	39	4	0.03372	BP	Uqcrb, Cox20, Cox6a1, COX1
GO:0005730	nucleolus	447	23	0.03629	CC	Ikzf1, Top2a, Acat2, Fam111a, Eif3a, Ncl, Rad51, Rps6, LOC105244208, Pop4, Mki67, Upf3b, Pum3, S100a13, Leo1, Npm1, Rpl5, Rpl11, Rps7, Nol7, Lyar, LOC100862455, Rpl23, LOC100044627, Rpl31, Pin4, LOC105247253
GO:0006878	cellular copper ion homeostasis	10	2	0.03787	BP	App, Ccdc22
GO:0000400	four-way junction DNA binding	10	2	0.03802	MF	Rad51, Hmgb1, Gm21596
GO:0006974	cellular response to DNA damage stimulus	379	15	0.03806	BP	E2f7, Top2a, Dek, Gm9840, Rbx1, Trp63, Smc3, Rad51, Hpf1, Smc1a, Spdya, Immp2l, Npm1, Tpt1, Tank, Hmgb1, Gm21596
GO:0051781	positive regulation of cell division	41	4	0.03853	BP	Fgf7, Mdk, Ect2, Ptn
GO:0051493	regulation of cytoskeleton organization	268	7	0.03869	BP	Rac1, Cdkn1b, Ranbp1, Mypn, Hcls1, Nexn, Npm1
GO:0000800	lateral element	10	2	0.03901	CC	Smc3, Rad51
GO:0001891	phagocytic cup	10	2	0.03901	CC	Rac1, Bin2
GO:0003690	double-stranded DNA binding	406	10	0.0393	MF	Fli1, Ikzf1, E2f7, Trp63, Eaf2, Rad51, Nfia, Erg, Hmgb1, Gm21596, Pin4, LOC105247253
GO:0045740	positive regulation of DNA replication	33	4	0.04268	BP	Rac1, E2f7, Cst3, Npm1
GO:0003743	translation initiation factor activity	25	3	0.04321	MF	Eif3a, Eif5b, Eif3k
GO:0046700	heterocycle catabolic process	143	8	0.04478	BP	Hint1, Auh, Gsta3, Pon3, Dera, Upf3b, Aox1, Ssb
GO:0001736	establishment of planar polarity	33	3	0.04524	BP	Ift20, Rac1, Trp63
GO:0016504	peptidase activator activity	19	3	0.04529	MF	Cdkn1b, App, Tank
GO:0006936	muscle contraction	137	4	0.04594	BP	Trdn, Mybpc1, Ndufs6, Cald1
GO:0004867	serine-type endopeptidase inhibitor activity	26	3	0.04774	MF	App, Serpinb1a, Wfdc3

## Sheet: B6 sus-con DOWN BNST
GO.ID	Term	Annotated	Significant	P	Category	Genes
GO:0007218	neuropeptide signaling pathway	30	7	0.00012	BP	Cartpt, Adcyap1, Cort, Prok2, Npsr1, Prlhr, Sstr2
GO:0045618	positive regulation of keratinocyte differentiation	8	4	0.00014	BP	Cyp27b1, Nme2, Vdr, Trim16
GO:0008171	O-methyltransferase activity	11	4	0.00062	MF	Comt, Mrm1, Cmtr1, Cmtr2
GO:0009267	cellular response to starvation	47	7	0.00215	BP	Comt, Cartpt, Atg4b, Klf10, Zfyve1, Pcsk9, Nupr1l
GO:0006741	NADP biosynthetic process	3	2	0.00447	BP	Nadk, Idh2
GO:0042891	antibiotic transport	3	2	0.00447	BP	Mfsd10, Tlr2
GO:0051532	regulation of NFAT protein import into nucleus	3	2	0.00447	BP	Dyrk2, Sppl3
GO:0060371	regulation of atrial cardiac muscle cell membrane depolarization	3	2	0.00447	BP	Cacna1g, Scn5a
GO:0060558	regulation of calcidiol 1-monooxygenase activity	3	2	0.00447	BP	Cyp27b1, Vdr
GO:0086015	SA node cell action potential	3	2	0.00447	BP	Cacna1g, Scn5a
GO:0086045	membrane depolarization during AV node cell action potential	3	2	0.00447	BP	Cacna1g, Scn5a
GO:0007193	adenylate cyclase-inhibiting G-protein coupled receptor signaling pathway	19	4	0.00561	BP	Cort, Sstr2, Htr1d, Chrm5
GO:0020037	heme binding	44	6	0.00701	MF	Cyp27b1, Stc2, Ngb, Dgcr8, Abcb6, Hba-a2
GO:0048786	presynaptic active zone	4	2	0.0087	CC	Otof, Slc17a7
GO:0006370	7-methylguanosine mRNA capping	4	2	0.00871	BP	Cmtr1, Cmtr2
GO:0060058	positive regulation of apoptotic process involved in mammary gland involution	4	2	0.00871	BP	Vdr, B4galt1
GO:0090385	phagosome-lysosome fusion	4	2	0.00871	BP	Tmem175, Rab39
GO:2000416	regulation of eosinophil migration	4	2	0.00871	BP	Adam8, Cd300a
GO:0004844	uracil DNA N-glycosylase activity	4	2	0.00876	MF	Ung, Ccno
GO:0008174	mRNA methyltransferase activity	4	2	0.00876	MF	Cmtr1, Cmtr2
GO:0005184	neuropeptide hormone activity	12	3	0.01014	MF	Cartpt, Adcyap1, Cort
GO:0005245	voltage-gated calcium channel activity	13	3	0.01281	MF	Cacna1g, Cacng5, Ncs1
GO:0045211	postsynaptic membrane	66	7	0.0141	CC	Comt, Chrna2, Cacng5, Gpr156, Kctd16, Ncs1, Chrm5
GO:0071546	pi-body	5	2	0.0141	CC	Tdrd1, Tdrd5
GO:0060046	regulation of acrosome reaction	5	2	0.01414	BP	B4galt1, Pkdrej
GO:0080009	mRNA methylation	5	2	0.01414	BP	Cmtr1, Cmtr2
GO:2000674	regulation of type B pancreatic cell apoptotic process	5	2	0.01414	BP	Ngf, Neurod1
GO:0005179	hormone activity	37	7	0.01492	MF	Stc2, Cartpt, Thpo, Adcyap1, Cort, Inha, Amh
GO:0007623	circadian rhythm	65	7	0.01541	BP	Cartpt, Ngf, Per3, Cort, Prok2, Klf10, Nfil3
GO:0030672	synaptic vesicle membrane	19	4	0.0155	CC	Slc2a3, D230025D16Rik, Otof, Slc17a7
GO:0016021	integral component of membrane	1771	89	0.0166	CC	Comt, Mfsd10, Slc25a42, Stard3nl, Slc2a3, Has1, Slc2a9, Fgfrl1, Tmem175, Plxdc1, Tmem129, Slc16a10, Cacna1g, Marveld2, Chrna2, Mief1, Sidt1, Trip6, Tnfrsf25, Adam8, Tspan4, Rdh10, Nrp2, Slc40a1, Abcb6, Htr4, Gbgt1, Adam33, Slc52a3, Tlr2, Sema4a, B4galt1, Mxra8, Cwh43, Sppl3, Nup210, Itga11, Cmtm7, Scn5a, Slco2a1, Amigo3, Odf4, Noc4l, Rhbdd3, Cyb561a3, Cd300a, Tmem109, Gdpd5, Crb2, Cox18, Slc12a8,…
GO:0000778	condensed nuclear chromosome kinetochore	6	2	0.0206	CC	Rec8, Cenpa
GO:0045830	positive regulation of isotype switching	6	2	0.02067	BP	Ung, Pagr1a
GO:0071526	semaphorin-plexin signaling pathway	6	2	0.02067	BP	Nrp2, Sema4a
GO:0019825	oxygen binding	6	2	0.02079	MF	Ngb, Hba-a2
GO:0007601	visual perception	49	6	0.02086	BP	Unc119, Nob1, Ngb, Rdh10, Gprc5c, Prcd
GO:0071944	cell periphery	1616	83	0.0239	CC	Comt, Cd52, Mfsd10, Slc2a3, Has1, Slc2a9, Eps8l1, Fgfrl1, Plxdc1, Arhgef25, Slc16a10, Nme2, Cacna1g, Ntn1, Marveld2, Chrna2, Parvg, Vdr, Trip6, Tnfrsf25, Gfra1, Cpn1, Adam8, Tspan4, Nrp2, Slc40a1, Abcb6, Htr4, Lamc2, Arfgap2, Slc52a3, Zgpat, Tlr2, Sema4a, B4galt1, Fancg, Bnc2, Sppl3, Rasal1, Tyk2, Itga11, Scn5a, Slco2a1, Inha, Cd300a, Crb2, Kcnk9, Dchs1, Kcnh3, Zbtb42, Baiap2l1, Trhr2, Cacng5, En…
GO:0017112	Rab guanyl-nucleotide exchange factor activity	17	3	0.02713	MF	Dennd6b, Dennd3, Dennd2a
GO:0030424	axon	140	9	0.0274	CC	Comt, Adcyap1, Gfra1, Nrp2, Gdpd5, Rtn4rl2, Ncs1, Slc17a7, Txnrd2
GO:0031045	dense core granule	7	2	0.0281	CC	Adam8, Ncs1
GO:0043046	DNA methylation involved in gamete generation	7	2	0.0282	BP	Tdrd1, Tdrd5
GO:0048261	negative regulation of receptor-mediated endocytosis	7	2	0.0282	BP	Unc119, Pcsk9
GO:0004842	ubiquitin-protein transferase activity	174	10	0.02831	MF	Trim28, Tmem129, Klhl22, Trim62, Klhl14, Fbxo41, Fbxl22, Klhl40, Kbtbd6, Naip2
GO:0031463	Cul3-RING ubiquitin ligase complex	31	4	0.0314	CC	Klhl22, Klhl14, Klhl40, Kbtbd6
GO:0030054	cell junction	409	21	0.0335	CC	Fgfrl1, Plxdc1, Marveld2, Chrna2, Parvg, Trip6, Tspan4, B4galt1, Itga11, Scn5a, Baiap2l1, Nphp4, Cacng5, Sntb2, Prrt2, Gpr156, Kctd16, Otof, Ncs1, Slc17a7, Chrm5
GO:0007268	chemical synaptic transmission	179	13	0.03436	BP	Cacna1g, Cartpt, Chrna2, Adcyap1, Htr4, Ngf, Neurod2, Prlhr, Otof, Ncs1, Slc17a7, Htr1d, Chrm5
GO:0043235	receptor complex	127	12	0.0362	CC	Plxdc1, Chrna2, Vdr, Trip6, Gfra1, Tlr2, Itga11, Cacng5, Gpr61, Gprc5c, Kctd16, Lime1
GO:0030688	preribosome, small subunit precursor	8	2	0.0365	CC	Nob1, Noc4l
GO:0006817	phosphate ion transport	8	2	0.03664	BP	Stc2, Slc17a7
GO:0060253	negative regulation of glial cell proliferation	8	2	0.03664	BP	Adcyap1, Idh2
GO:0070269	pyroptosis	8	2	0.03664	BP	Nlrp1b, Naip2
GO:0005355	glucose transmembrane transporter activity	8	2	0.03684	MF	Slc2a3, Slc2a9
GO:0035303	regulation of dephosphorylation	50	4	0.03903	BP	Sppl3, Cd300a, Zfyve1, Chrm5
GO:0031674	I band	42	3	0.0391	CC	Scn5a, Fbxl22, Klhl40
GO:1902652	secondary alcohol metabolic process	43	3	0.03913	BP	Cyp27b1, Disp3, Pcsk9
GO:0033046	negative regulation of sister chromatid segregation	18	2	0.03914	BP	Klhl22, Recql4
GO:0004673	protein histidine kinase activity	4	2	0.03917	MF	Nme2, Kcnh3
GO:0099095	ligand-gated anion channel activity	4	2	0.03917	MF	Slc17a7, Chrm5
GO:0002758	innate immune response-activating signal transduction	61	3	0.03923	BP	Adam8, Tlr2, Cd300a
GO:1903557	positive regulation of tumor necrosis factor superfamily cytokine production	37	2	0.03924	BP	Adam8, Tlr2
GO:0007423	sensory organ development	223	9	0.03928	BP	Ntn1, Rdh10, Bnc2, Neurod1, Dchs1, Nphp4, Sox3, Pdzd7, Sco2
GO:0046426	negative regulation of JAK-STAT cascade	20	3	0.04142	BP	Sac3d1, Neurod1, Rtn4rl2
GO:0006929	substrate-dependent cell migration	15	4	0.04538	BP	Ntn1, Adam8, Nrp2, Itga11
GO:0030016	myofibril	67	5	0.0455	CC	Arhgef25, Scn5a, Fbxl22, Klhl40, Sco2
GO:0033391	chromatoid body	9	2	0.0458	CC	Tdrd1, Tdrd5
GO:0042734	presynaptic membrane	9	2	0.0458	CC	Kctd16, Otof
GO:0005248	voltage-gated sodium channel activity	9	2	0.04615	MF	Cacna1g, Scn5a
GO:0051183	vitamin transporter activity	9	2	0.04615	MF	Slc2a3, Slc52a3
GO:0071705	nitrogen compound transport	802	32	0.04625	BP	Unc119, Slc25a42, Trim28, Tmem129, Cartpt, Sidt1, Trip6, Adcyap1, Abcb6, Atg4b, Arfgap2, Slc52a3, Tlr2, Dyrk2, Gpn2, Sppl3, Nup210, Idh2, D230025D16Rik, Rhbdd3, Cd300a, Neurod1, Dennd2a, Arfrp1, Trim16, Vtcn1, Rab39, Ap5s1, Slc17a7, Chrm5, Vps25, Lime1

[truncated: 10 more sheets: D2 res-con UP BNST, D2 res-con DOWN BNST, D2 sus-con UP BNST, D2 sus-con DOWN BNST, B6 res-con UP vHPC, B6 res-con DOWN vHPC, B6 sus-con UP vHPC, B6 sus-con DOWN vHPC, D2 sus-con UP vHPC, D2 res-con DOWN vHPC]
