# Supplementary material for: Genetic Control of Myelin Plasticity after Chronic Psychosocial Stress
Source: PubMed Central journal article supplement (PMC6071195; doi:10.1523/eneuro.0166-18.2018), 2018-07-11

**A**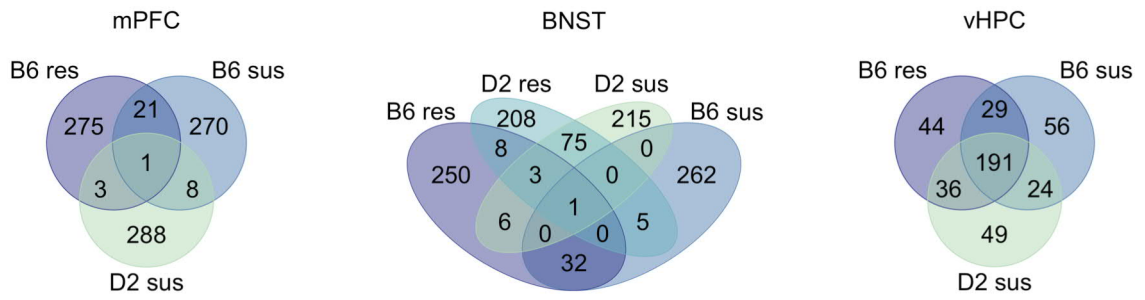**B**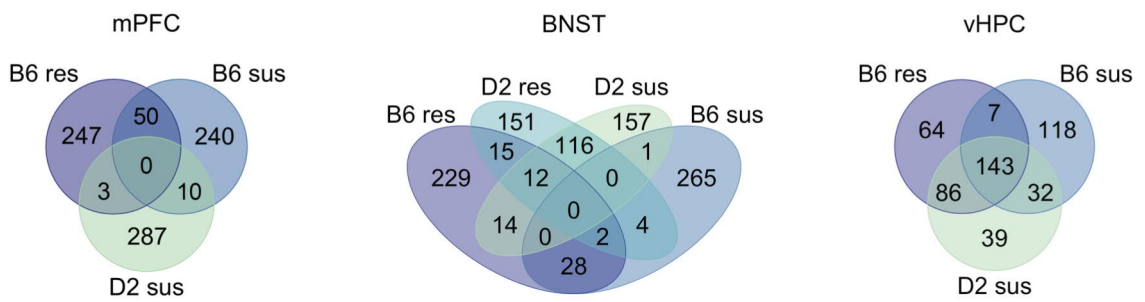**C**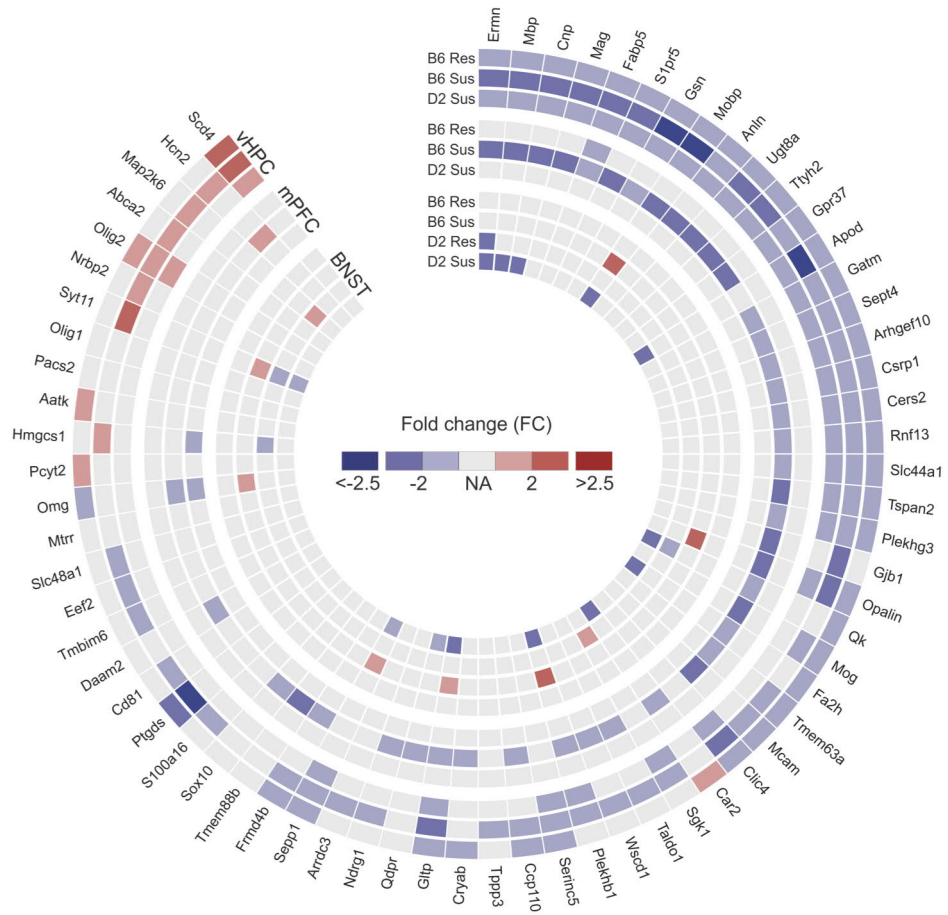

Supplement: sup_enu-eN-NWR-0166-18-s06.pdf [file sup_enu-eN-NWR-0166-18-s06.pdf]
